# **The neuropeptides VIP and PACAP inhibit SARS-CoV-2 replication in monocytes and lung epithelial cells, decrease the production of proinflammatory cytokines, and VIP levels are associated with survival in severe COVID-19 patients.**

Jairo R. Temerozo<sup>1,10,\*</sup>, Carolina Q. Sacramento<sup>2,3</sup>, Natalia Fintelman-Rodrigues<sup>2,3</sup>, Camila R. R. Pão<sup>2</sup>, Caroline S. de Freitas<sup>2,3</sup>, Suelen da Silva Gomes Dias<sup>2</sup>, André C. Ferreira<sup>2,3,4</sup>, Mayara Mattos<sup>2,3</sup>, Vinicius Cardoso Soares<sup>2,5</sup>, Livia Teixeira<sup>2</sup>, Isacclaudia G. de Azevedo-Quintanilha<sup>2</sup>, Eugenio D. Hottz<sup>6</sup>, Pedro Kurtz<sup>7,8</sup>, Fernando A. Bozza<sup>8,9</sup>, Patrícia T. Bozza<sup>2</sup>, Thiago Moreno L. Souza<sup>2,3</sup>, Dumith Chequer Bou-Habib<sup>1,10,\*</sup>

<sup>1</sup>Laboratory on Thymus Research, Oswaldo Cruz Institute, Fiocruz, Rio de Janeiro, RJ, Brazil; <sup>2</sup>Laboratory of Immunopharmacology, Oswaldo Cruz Institute, Fiocruz, Rio de Janeiro, RJ, Brazil; <sup>3</sup>National Institute for Science and Technology on Innovation in Diseases of Neglected Populations (INCT/IDPN), Center for Technological Development in Health (CDTS), Fiocruz, Rio de Janeiro, RJ, Brazil; <sup>4</sup>Iguaçu University, Nova Iguaçu, RJ, Brazil; <sup>5</sup>Program of Immunology and Inflammation, Federal University of Rio de Janeiro, UFRJ, Rio de Janeiro, RJ, Brazil; <sup>6</sup>Laboratory of Immunothrombosis, Department of Biochemistry, Federal University of Juiz de Fora (UFJF), Juiz de Fora, Minas Gerais, Brazil; <sup>7</sup>Paulo Niemeyer State Brain Institute, Rio de Janeiro, RJ, Brazil; <sup>8</sup>D'Or Institute for Research and Education, Rio de Janeiro, RJ, Brazil; <sup>9</sup>Evandro Chagas National Institute of Infectious Diseases, Fiocruz, Rio de Janeiro, RJ, Brazil; <sup>10</sup>National Institute for Science and Technology on Neuroimmunomodulation, Oswaldo Cruz Institute, Fiocruz, Rio de Janeiro, RJ, Brazil.

**Key words:** SARS-CoV-2/COVID-19/VIP/PACAP/Monocytes

**Corresponding authors:** Jairo R. Temerozo and Dumith Chequer Bou-Habib

Laboratório de Pesquisas sobre o Timo, Instituto Oswaldo Cruz/Fiocruz  
Av. Brasil, 4365 - Manguinhos - 21040-360.  
Pav. Leonidas Deane/510 - Rio de Janeiro, RJ, Brazil,  
Tel. +55 21 3865-8139

E-mail: jairo.jrt@gmail.com, dumith@ioc.fiocruz.br, dumith.chequer@gmail.com

## 1     **Abstract**

2     Infection by SARS-CoV-2 may elicit uncontrolled and damaging inflammatory  
3     response, thus it is critical to identify compounds able to inhibit virus replication  
4     and thwart the inflammatory reaction. Here, we show that the immunoregulatory  
5     neuropeptides VIP and PACAP were able to inhibit SARS-CoV-2 RNA synthesis in  
6     human monocytes and viral production in lung epithelial cells, protect the cells  
7     from virus-induced cytopathicity and reduce the production of proinflammatory  
8     mediators. Both neuropeptides prevented the SARS-CoV-2-induced activation of  
9     NF- $\kappa$ B and SREBP1 and SREBP2, transcriptions factors involved in  
10    proinflammatory reactions and lipid metabolism, respectively, and promoted CREB  
11    activation in infected monocytes, a transcription factor with antiapoptotic activity  
12    and also a negative regulator of NF- $\kappa$ B. VIP levels were elevated in plasma from  
13    patients with severe COVID-19, which correlated with the inflammatory marker  
14    CRP, viral load, and survival on those patients. Our results provide scientific  
15    evidence to further support clinical investigation of these neuropeptides against  
16    COVID-19.

## 17    **Introduction**

18       Individuals with coronavirus disease 2019 (COVID-19), caused by the  
19    severe acute respiratory syndrome coronavirus 2 (SARS-CoV-2) <sup>1</sup>, may present  
20    asymptomatic or mild disease to severe lung inflammation and the life threatening  
21    acute respiratory distress syndrome (ARDS) <sup>2,3</sup>, besides a variety of  
22    extrapulmonary manifestations due to multiple organ infections <sup>4</sup>. Severe SARS-  
23    CoV-2 infection is characterized by elevated serum levels of proinflammatory  
24    mediators (hypercytokinemia, also known as cytokine storm) such as, for example,

25 IL-2, IL-6, TNF- $\alpha$ , IL-8, IL-1 $\beta$ , IFN- $\gamma$ <sup>2,3,5,6</sup>. The dysregulated immune response and  
 26 production of cytokines and chemokines are hallmarks of SARS-CoV-2 infection  
 27 and have been pointed as the main cause of the severe lung damage and  
 28 unfavorable clinical progression of patients with COVID-19<sup>3-8</sup>. Lately, the in vivo  
 29 formation of neutrophil extracellular traps (NETs) in the lungs, SARS-CoV-2-  
 30 induced inflammasome activation and cell death by pyroptosis, have also been  
 31 considered as risk factors in critically ill COVID-19 patients<sup>9-14</sup>.

32 During the inflammatory response to human pathogenic coronaviruses  
 33 (hCoVs), circulating neutrophils and monocytes migrate and infiltrate the lungs<sup>15,16</sup>  
 34 and other organs, where they release toxic amounts of neutrophil extracellular  
 35 traps<sup>9-12</sup> and proinflammatory cytokines, thus contributing to potentiate and  
 36 perpetuate the inflammation and eventually exacerbating the tissue damage<sup>17-19</sup>.  
 37 In fact, it has been reported that SARS-CoV-2 induces neutrophils to release  
 38 NETs, which are present in the plasma and lungs of critically ill COVID-19  
 39 patients, suggesting that they are central components of the exacerbated  
 40 inflammatory reaction occurring in individuals with COVID-19. Previous studies  
 41 showed that MERS-CoV- and SARS-CoV-infected macrophages produce high  
 42 levels of pro-inflammatory cytokines and chemokines<sup>20,21</sup>, and, more recently, that  
 43 lung monocytes from severe pneumonia caused by SARS-CoV-2 are potent  
 44 producers of TNF- $\alpha$  and IL-6, whose levels were increased in the serum of the  
 45 same patients<sup>7</sup>. Also, we and other authors have found that SARS-CoV-2  
 46 induces inflammasome activation and cell death by pyroptosis in human primary  
 47 monocytes, either by experimental or natural infection, which are associated with  
 48 lung inflammation and are risk factors in critically ill COVID-19 patients<sup>13,14</sup>.

Thus, it is critical to identify agents able to prevent the infection and concurrently thwart the prototypical dysregulated inflammatory reaction and tissue lesions secondary to SARS-CoV-2 infection. In this work, we evaluated whether the neuropeptides Vasoactive Intestinal Peptide (VIP) and Pituitary Adenylate Cyclase-Activating Polypeptide (PACAP), can present protective effects in SARS-CoV-2 infection. VIP and PACAP share many biological properties through their interaction with the G protein-coupled receptors VPAC1, VPAC2 and PAC1<sup>22</sup>, which are systemically distributed. They have well-characterized regulatory effects on the immune system and anti-inflammatory properties, including control of cell activation and differentiation, down-regulation of inflammatory cytokines and reactive oxygen species and induction of the anti-inflammatory cytokine IL-10<sup>23-28</sup>. Based on their consistent anti-inflammatory activities, both neuropeptides have been considered as promising therapeutic agents for autoimmune disorders and chronic inflammatory illnesses<sup>29-31</sup>. We report here that VIP and PACAP inhibit SARS-CoV-2 gene replication in human monocytes, viral production in lung epithelial cells, and reduced cellular production of proinflammatory mediators. We also found that VIP levels were elevated in the plasma of individuals with severe manifestations of COVID-19, which correlated with survival on critically ill patients.

## Results

**VIP and PACAP inhibit SARS-CoV-2 RNA synthesis in human primary monocytes, protecting them from virus-mediated cytopathic effects.** Based on our previous findings showing that VIP and PACAP present antiviral effects on HIV-1 infection<sup>32,33</sup>, and on their ability to control the inflammatory response, we initially investigated whether both neuropeptides could inhibit viral life cycle in

73 SARS-CoV-2-infected monocytes. Thus, human primary monocytes were treated  
74 with either VIP or PACAP, then infected with SARS-CoV-2 and the replication of  
75 viral genome was measured 24 hours later. We found that VIP significantly  
76 reduced the SARS-CoV-2 RNA synthesis, achieving 33% and 45% inhibition at 5  
77 nM and 10 nM, respectively (Fig. 1A). PACAP similarly inhibited levels of viral  
78 RNA synthesis with 5 nM (40%) and 10 nM (39%) (Fig. 1B). In parallel, we  
79 observed that VIP and PACAP, at 10 nM each, completely protected the  
80 monocytes from the SARS-CoV-2-mediated cytopathic effect, as measured by the  
81 LDH levels in the cell culture supernatant (Fig. 1C). These results show that both  
82 neuropeptides are similarly effective in their ability to reduce SARS-CoV-2 genome  
83 replication in monocytes and to prevent the virus-induced cell death.

84 **Receptor contribution for the VIP and PACAP mediated inhibition of SARS-**  
85 **CoV-2 replication.** Because VIP binds the receptors VPAC1 and VPAC2, and  
86 PACAP has high affinity for PAC1, but also binds the VPAC1 and VPAC2<sup>22</sup>, we  
87 analyzed the role of the individual receptors in the neuropeptide-mediated  
88 inhibition of SARS-CoV-2 RNA replication. To this end, monocytes were treated  
89 with specific agonists to VPAC1, VPAC2 and PAC1 (Ala-VIP, Bay 55 9837 and  
90 Maxadilan, respectively), and then exposed to SARS-CoV-2. We found that the  
91 sole activation of VPAC1 at 1 nM, 5 nM and 10 nM, and of VPAC2 at 1 nM,  
92 significantly reduced the SARS-CoV-2 gene replication (Fig. 1D). Of note, the  
93 optimal concentrations of the receptor agonists that significantly decreased the  
94 SARS-CoV-2 RNA synthesis were similar to those of the natural receptor ligands  
95 VIP and PACAP.

196 We also evaluated if the combination of VIP and PACAP could reduce the viral  
197 replication, while reducing the optimal concentration, as VIP and PACAP are  
198 reported to act synergistically or in additive fashion in the inhibition of HIV-1  
199 replication in macrophages <sup>32</sup>. We did not observe any increase of viral inhibition  
200 activity or reduction of optimal dose when the peptides were combined, being the  
201 10 nM dose the optimal concentration for both peptides, combined or not (Fig. 1E).

202 Overall, these findings suggest that VPAC1 and VPAC2 receptors are the main  
203 contributors for the VIP- and PACAP-mediated SARS-CoV-2 inhibition in  
204 monocytes, and that the sole activation of these receptors can lead to a  
205 diminished viral inhibition similar as that induced by the own neuropeptides.

206 **VIP and PACAP inhibit SARS-CoV-2 replication in Calu-3 cells and protect**  
207 **them from virus-mediated cytopathic effects.** We next evaluated whether VIP  
208 and PACAP could also be able to restrict the virus production in pulmonary cells,  
209 one of the major targets of SARS-CoV-2. Thus, Calu-3 cells, a lineage of epithelial  
210 lung cells highly susceptible to this virus, were infected with SARS-CoV-2 and  
211 treated with a range of concentrations of either peptide. We found that VIP  
212 decreased the productive infection, reaching 40% and 30% inhibition with 1 nM  
213 and 5 nM, respectively (Fig. 2A). PACAP also diminished virus production by 35%  
214 and 40% at concentrations equivalent to 10 nM and 50 nM (Fig. 2B). The different  
215 optimal concentrations between VIP and PACAP in their ability to control the viral  
216 productive infection in Calu-3 cells might be explained by the relative abundance  
217 of the neuropeptide receptors, since it has been shown that these cells express  
218 only VPAC1 <sup>34</sup>. However, all three receptors are reported to be expressed in lungs,  
219 with some studies showing that VPAC1 levels are much higher than VPAC2 (the

120 other VIP receptor) or PAC1 (to which PACAP binds with higher affinity than to  
121 VPAC1 and VPAC2<sup>22,35–37</sup>). Likewise what we found for monocytes, VIP and  
122 PACAP also protected Calu-3 cells from the SARS-CoV-2-induced cytopathogenic  
123 effects, at the same optimal viral inhibitory concentrations (1 nM and 50 nM,  
124 respectively) of each neuropeptide (Fig. 2C). Using agonists for VIP and PACAP  
125 receptors we also verified that VPAC1 is the main receptor involved the inhibition  
126 of SARS-CoV-2 in Calu-3 cells, emulating the level of inhibition achieved with VIP,  
127 while the exposure to a VPAC2 agonist resulted in a more modest inhibition (Fig.  
128 2D). The stimulus with a PAC1 agonist had no effect on viral replication (Fig. 2D).

129         Given that monocytes and epithelial cells can be in close proximity in the  
130 lungs, and, thus, can interact and exchange molecules, we investigated whether  
131 conditioned medium (CM) obtained by SARS-CoV-2-infected monocytes exposed  
132 to VIP or PACAP could repress the viral production in human lung cells. While the  
133 transference of CM from uninfected monocytes, treated or not with either  
134 neuropeptide, did not modify the virus growth, the addition of CM (at 50% vol/vol –  
135 the combination of fresh medium at this ratio did not alter the basal replication of  
136 SARS-CoV-2 in Calu-3 cells, Fig. 2E) from infected monocytes increased viral  
137 replication 33% when compared to cells maintained with the equivalent  
138 combination of fresh media (Fig. 2E). However, when infected Calu-3 cells were  
139 exposed to CM from infected monocytes treated with VIP or PACAP, we observed  
140 a reduction of 30% and 21% in SARS-CoV-2 replication in these cells (Fig. 2E).  
141 This finding raises the hypothesis that both neuropeptides, besides inhibiting the  
142 SARS-CoV-2 gene replication, induce monocyte production and release of factors  
143 endowed with antiviral activity, which may increase the resistance of neighboring  
144 cells to SARS-CoV-2 growth. This bystander effect can reduce viral propagation,

145 thus eventually protecting the tissues from lesions secondary to SARS-CoV-2-  
146 replication and dissemination. Future studies are needed to identify the nature of  
147 these putative soluble factors.

148 **Influence of peptidases on VIP and PACAP inhibition of SARS-CoV-2**  
149 **replication in pulmonary cells.** Lung cells are known to express several  
150 peptidases <sup>38–40</sup>, whose interaction with VIP and PACAP on the cell membrane  
151 could modulate the effects of these neuropeptides, favoring or hindering the  
152 SARS-CoV-2 replication inhibitory effect. Thus, we evaluated the inhibitory  
153 potential of VIP and PACAP in SARS-CoV-2-infected Calu-3 cells in the presence  
154 of Bestatin, an inhibitor of several aminopeptidases, including aminopeptidase N,  
155 which also acts as receptor for the human coronavirus E229 <sup>41</sup>, but not for SARS-  
156 CoV-2 <sup>42</sup>. While Bestatin alone (500 nM) did not change the virus yield (Fig. 3A),  
157 we verified a gain of effect of VIP at 0.5 nM and 10 nM when combined with  
158 Bestatin, (Fig. 3B). Moreover, PACAP achieved an optimal inhibitory concentration  
159 at 5 nM when combined with Bestatin, a dose ten-times lower than its optimal  
160 inhibitory concentration when alone (50 nM) (Fig. 3C). This result suggests that  
161 VIP and PACAP could be targeted by some of the peptidases expressed in  
162 pulmonary cells, thus requiring a high concentration to inhibit SARS-CoV-2  
163 replication in these cells.

164 **Association with antivirals increments the neuropeptide anti-SARS-CoV-2**  
165 **effect in pulmonary cells.** Given the enhancement of PACAP-mediated SARS-  
166 CoV-2 inhibition when in the presence of a protease inhibitor, we tested whether  
167 the association of the neuropeptides with the protease-targeting antivirals could  
168 also increase VIP and PACAP inhibition of SARS-CoV-2 replication in pulmonary



169 cells, as several viral protease inhibitors can also target cell proteases and  
 170 peptidases <sup>43</sup>. We tested the combination of VIP or PACAP with atazanavir, a  
 171 classical HIV-1 protease inhibitor which also inhibits SARS-CoV-2 <sup>44</sup>, or with  
 172 ritonavir (whose aminopeptidase inhibition is more prominent than atazanavir <sup>43</sup>).  
 173 For comparison, we also evaluated the combination with remdesivir, an inhibitor of  
 174 RNA-dependent RNA polymerase and potent inhibitor of SARS-CoV-2 replication  
 175 in vitro <sup>45</sup>. The concentrations used for atazanavir (ATV) and ritonavir (RDV) were  
 176 5 uM, which did not significantly inhibit SARS-CoV-2 replication (Fig. 4A). The  
 177 combination the neuropeptides with ATV, did not promote any increment in the  
 178 inhibition of SARS-CoV-2 replication (Fig. 4B and 4C). However, when in  
 179 combination with RTV, VIP and PACAP performed better than alone, with a higher  
 180 inhibition with VIP+RTV at 5 nM than VIP alone at the same concentration; and  
 181 PACAP achieving an optimal inhibitory concentration of 5 nM (Fig. 4C), equal to  
 182 that observed when combined to Bestatin (Fig. 3C). Surprisingly, the association  
 183 of VIP or PACAP with remdesivir (RDV) resulted in a strong potentiation of VIP  
 184 and PACAP inhibition of SARS-CoV-2 replication in Calu-3 cells (Fig. 4B and 4C).

185 **VIP and PACAP reduce production of proinflammatory cytokines by SARS-**  
 186 **CoV-2-infected monocytes and Calu-3 cells.** Given the hypothesis that  
 187 controlling the production of proinflammatory cytokines may be critical for reducing  
 188 SARS-CoV-2 replication and limiting tissue damages, and based on evidence that  
 189 VIP and PACAP can regulate the inflammatory response <sup>27,46</sup>, we next evaluated  
 190 whether both neuropeptides could attenuate the production of proinflammatory  
 191 mediators by SARS-CoV-2-infected monocytes or lung epithelial cells. As shown  
 192 in Fig. 5A, SARS-CoV-2-infected monocytes produced large amounts of the  
 193 proinflammatory mediators IL-6, IL-8, TNF- $\alpha$  and MIF relative to uninfected cells

(15, 4, 12 and 18 times more, respectively). In contrast, the treatment of monocytes with either neuropeptide after SARS-CoV-2 infection reduced to 66%, 50%, 66% and 50% the cellular production of IL-6, IL-8, TNF- $\alpha$  and MIF, respectively. Furthermore, VIP and PACAP reverted by approximately the same degree the release of IL-6 and IL-8 by Calu-3 cells (Fig. 5B), implying that VIP and PACAP may offer a critical protection to inflamed lungs affected by SARS-CoV-2 replication. Because proinflammatory cytokines may favor SARS-CoV-2 replication, which, in turn, can amplify the cellular synthesis of these mediators, these findings may support our assumption that VIP and PACAP offer tissue protection by inhibiting virus replication and regulating the boost of cytokine production.

**VIP and PACAP regulate the activation of transcription factors in SARS-CoV-2-infected monocytes.** Based on the fact that the transcription factor NF- $\kappa$ B is critically involved in the cellular production of inflammatory mediators<sup>47</sup>, and on our own findings that VIP and PACAP can inhibit its activation in HIV-1-infected macrophages<sup>33</sup>, we investigated whether both neuropeptides would exert this same effect on SARS-CoV-2-infected monocytes. As can be seen in Fig. 6A, we initially observed that NF- $\kappa$ B is up-modulated in infected cells (as measured by the increased amount of phosphorylated NF- $\kappa$ Bp65 subunit) and, in addition, that VIP and PACAP reduced the NF- $\kappa$ Bp65 phosphorylation, evidencing the significant anti-NF- $\kappa$ Bp65 activity of VIP and PACAP. We believe that the SARS-CoV-2-induced NF- $\kappa$ B activation could have contributed for the elevated production of proinflammatory cytokines by SARS-CoV-2-infected monocytes, and that the inhibition of this transcription factor by VIP and PACAP was critical for the decreased synthesis of these mediators by the same cells. Following, we analyzed

the effects of both neuropeptides on the activation of CREB, a transcription factor induced by several GPCR ligands, including VIP and PACAP<sup>48</sup>, and also involved in the induction of anti-inflammatory cytokines<sup>49,50</sup>. CREB and NF- $\kappa$ B share the CREB-binding protein/p300 (CBP/p300 protein) as a cofactor, and CREB activation results in the inhibition of NF- $\kappa$ B<sup>51</sup>. We found that activation of CREB was diminished in SARS-CoV-2-infected monocytes, a finding coherent with NF- $\kappa$ B activation in the same cells (Fig. 6B). Consistent with this finding, VIP and PACAP promoted CREB activation (as measured by augmentation of CREB phosphorylation) in those infected monocytes, a result matching the inhibition of NF- $\kappa$ B and the reduction of cellular production of proinflammatory cytokines.

We also evaluated in SARS-CoV-2-infected monocytes the expression of the active form of SREBP-1 and SREBP-2, a transcription factor that also interacts with CBP/p300<sup>52</sup>, and is crucial for the replication of several viruses, including coronaviruses<sup>53–55</sup>. In fact, we and other authors reported that SARS-CoV-2 infection promotes the activation of SREBP, and that this activation is associated with enhanced viral replication<sup>56</sup> and COVID-19 disease severity<sup>57</sup>. We found that the levels of both isoforms of SREBP in active state are increased in SARS-CoV-2-infected monocytes, but reduced in infected monocytes exposed to VIP and PACAP when compared to the untreated infected cells, lowering to the same basal levels found in uninfected monocytes (Fig. 6C and 6D, Supp. Fig. 1).

Together, these results suggest that the restriction of SARS-CoV-2 replication in monocytes and, possibly, in pulmonary cells (represented in this work by the Calu-3 cell line) by VIP and PACAP can also be the outcome of the intrinsic modulation of transcription factors related to the regulation of inflammatory factors that are involved directly and indirectly with the viral replication, either by

244 favoring the cellular damage, through exacerbating the inflammation, or by  
245 promoting a permissive cellular microenvironment for viral replication.

# **246 Plasma levels of VIP are elevated in patients with severe forms of COVID-19.**

247 Based on our results showing that VIP and PACAP, besides inhibiting viral  
248 replication and production, can also control the production of proinflammatory  
249 mediators by SARS-CoV-2-infected monocytes and lung epithelial cells, we  
250 measured the levels of both neuropeptides in plasma samples of SARS-CoV-2-  
251 infected individuals. We found that the amount of VIP is significantly elevated in  
252 patients affected by the most severe forms of infection, relative to levels of  
253 uninfected healthy controls and asymptomatic/mild patients (Fig. 7A). We also  
254 observed that some critically ill patients had increased levels of PACAP, but  
255 without statistical significance when considering the entire group (Fig. 7B). In  
256 addition, levels of VIP positively correlated with levels of C-reactive protein (CRP)  
257 (Fig. 7C), but neither VIP nor PACAP levels correlated with other inflammatory  
258 markers, such as D-dimer, fibrinogen or IL-6 (data not shown), or with each other  
259 (Fig. 7D). We found a positive correlation between VIP levels and viral load in  
260 positive swab samples from mild and severe COVID-19 patients (Fig. 7E and 7F).  
261 Severe COVID-19 patients admitted to the ICU were further stratified between  
262 those requiring invasive mechanical ventilation or noninvasive O<sub>2</sub>  
263 supplementation, or according to the 28-day mortality outcome as survivors or  
264 non-survivors. For PACAP we did not observe statistical significance in the  
265 stratified groups (Fig. 7G and 7H), the same for VIP considering respiratory  
266 support (Fig. 7I). However, we found that VIP plasma levels were significantly  
267 higher in survivors than in non-survivors (Fig. 7J).

268 Taking into account that VIP and PACAP regulate inflammatory reactions, it  
269 is possible that their increased circulating amounts reflect a counter-regulatory  
270 effect elicited by the dysregulated immune response typical of the more severe  
271 clinical status of COVID-19 patients. The levels of VIP and PACAP in SARS-CoV-  
272 2-infected tissues should be a matter of future studies, to support our hypothesis.

## 273 Discussion

274 In this work, we report that the neuropeptides VIP and PACAP, endogenous  
275 molecules presenting anti-inflammatory properties, are able to inhibit SARS-CoV-2  
276 RNA synthesis and viral production and reduce the exacerbated synthesis of  
277 proinflammatory mediators due to infection, in human monocytes and lung  
278 epithelial cells. Also, we identified that VIP plasma levels are elevated in patients  
279 with severe forms of COVID-19, corresponding with viral load, and elevated VIP  
280 levels at ICU admission predicts patients' favorable outcome, including association  
281 with patient survival. Our findings provide the scientific basis for clinical trials with  
282 VIP (Aviptadil), which can be used in intravenous<sup>58</sup> and inhaled<sup>59</sup> formulations.  
283 Indeed, first results of clinical studies with VIP are expected to be disclosed in the  
284 next year<sup>58,59</sup>. Clinical data, along with mechanism described here, may allow  
285 additional larger trials with VIP, an overlooked molecule associated with antiviral,  
286 anti-inflammatory and enhanced survival activities.

287 Both neuropeptides regulate the inflammatory response due to their ability  
288 to decrease the production of proinflammatory mediators, and to elicit the  
289 production of anti-inflammatory molecules, Given that VIP and PACAP and their  
290 receptors are systemically distributed, including the lungs<sup>22,60</sup>, brain and gut, we  
291 believe that the anti-SARS-CoV-2 effects of both neuropeptides would not be

restricted to the respiratory tract, as shown by many studies in other chronic inflammatory illnesses.

Here, we initially observed that VIP and PACAP decreased the genome replication of SARS-CoV-2 in monocytes, in parallel with protecting the cells from virus-induced cytopathicity. By diminishing the intracellular levels of viral RNA and other viral molecules, VIP and PACAP could prevent the cell death by pyroptosis, which has been described as one of the main causes of cell damage during SARS-CoV-2 infection<sup>13,14</sup>. While preserving the viability of monocytes, VIP and PACAP also diminished the production of the proinflammatory cytokines IL-6, IL-8, TNF- $\alpha$  and MIF by these cells, which is in agreement with the reported ability of these neuropeptides to regulate the inflammatory response<sup>24–27,61</sup>. We found similar results with lung epithelial cells, further supporting the assumption that VIP and PACAP may offer a critical protection to inflamed lungs affected by SARS-CoV-2 replication. Because these mediators are elevated in patients with COVID-19, it is possible that the higher amounts of VIP in patients with severe forms of infection may reflect a counter-regulatory feedback elicited by the dysregulated immune response of these patients. Interestingly, the cellular protection conferred by VIP or PACAP to SARS-CoV-2-infected monocytes can be transferred to other neighboring virus target cells (Fig. 2E), suggesting that a bystander effect can ultimately protect other SARS-CoV-2-infected cells not directly interacting with VIP or PACAP. More investigations are needed to identify the nature of the putative protecting factors present in the monocyte supernatants.

The ability of VIP and PACAP to inhibit the SARS-CoV-2-induced activation of the subunit p65 of the transcription factor NF- $\kappa$ B, pertain to a complex molecular

316 mechanism leading to reduction of proinflammatory cytokines synthesis by SARS-  
 317 CoV-2-infected monocytes. Also, we detected here that the transcription factor  
 318 CREB, which can act as a negative regulator of NF- $\kappa$ B<sup>62,63</sup>, is down-regulated in  
 319 SARS-CoV-2-infected monocytes, in opposition to NF- $\kappa$ B activation in the same  
 320 cells. In some models<sup>64–69</sup>, CREB activation is related to induction of anti-  
 321 inflammatory cytokines concomitant with reduction of pro-inflammatory molecules,  
 322 mainly through direct transcription of its targets, such as IL-10, or through  
 323 competing with NF- $\kappa$ B by their shared co-activator protein CBP/p300<sup>49,62,63,69</sup>.  
 324 Besides its role in the balance between pro- and anti-inflammatory cytokines,  
 325 CREB activation is also involved with the anti-apoptotic response in monocytes  
 326 and macrophages, during differentiation and inflammatory stimuli<sup>70,71</sup>. Thus, the  
 327 imbalance between CREB and NF- $\kappa$ B, either as a direct effect of infection by  
 328 SARS-CoV-2 or a consequence of exposure of bystander cells to viral products  
 329 and inflammatory molecules, could be an important target for inhibition of SARS-  
 330 CoV-2 deleterious effects, at least in monocytes and probably also in lung cells, as  
 331 a similar imbalance between CREB and NF- $\kappa$ B was observed in an acute  
 332 inflammatory pulmonary condition<sup>51</sup>.

333 The induction of SREBP activity by SARS-CoV-2 was consistent with data  
 334 showing its increase and association with COVID-19 severity in patients<sup>57</sup>.  
 335 SREBPs are transcription factors that have well-defined roles in the regulation of  
 336 cellular lipid homeostasis<sup>72</sup>. They exist in an inactive form associated to the  
 337 endoplasmatic reticulum, where initial activation occurs, completing the activation  
 338 in the Golgi apparatus before migrating to the nucleus<sup>72</sup>. SREBP1 regulates the  
 339 expression of fatty acid biosynthesis genes, whilst SREBP2 regulates genes  
 340 involved in cholesterol biosynthesis, intracellular lipid movement and lipoprotein

import<sup>72</sup>. While crucial for metabolic homeostasis, both transcription factors are involved in pathologies when misbalanced or overactivated<sup>72</sup>, and several viruses are reported to induce their activation, as for their optimal replication, the up-regulation of host lipid biosynthesis is a requirement<sup>53–55</sup>. In fact, our group just reported that SARS-CoV-2 activates SREBP-1 and other pathways of lipid metabolism in human cells, and that lipid droplets enhance viral replication and production of inflammatory mediators<sup>56</sup>. The inhibition of SREBP activation in SARS-CoV-2-infected monocytes exposed to VIP and PACAP points to a possible mechanism of viral inhibition directly related to the replicative cycle, since inhibiting SREBPs activation, the replication process can be restrained via limiting the supply of energy and building blocks, ultimately delaying or even stopping the replicative process.

Similar to NF-κB and CREB, the association of SREBP with CBP/p300<sup>52</sup> makes its function susceptible to the availability of this co-factor, which abundance can be low or high depending on the state of activation of NF-κB and CREB. Thus, the modulation of each one of these factors by VIP and PACAP can reflect a fine tuning of the transcriptional regulation of metabolic and inflammatory pathways, which in turn can affect the replication of SARS-CoV-2.

Because VIP and PACAP signaling pathway outcome is dependent of the combined action of the receptors activated by them (VIP and PACAP receptors can elicit cell signaling in homo and hetero dimers<sup>73</sup>), we evaluated whether they were involved in the final outcome analyzed. Our assays suggest that signaling through the receptors VPAC1 and VPAC2 contributed for VIP- and PACAP-mediated reduction of SARS-CoV-2 RNA synthesis in monocytes and viral



365 production in Calu-3 cells, with VPAC1 activation alone being able to reproduce  
366 the SARS-CoV-2 inhibition promoted by the natural neuropeptides. The inhibition  
367 profile of SARS-CoV-2 by VIP and PACAP in Calu-3 cells may be biased  
368 regarding the expected action in the lungs, since Calu-3 cells appear to express  
369 only VPAC1 <sup>34</sup>. However, lung tissues, while reported to express high levels of  
370 VPAC1, also express VPAC2 and PAC1 <sup>35,37</sup>, and, more specifically, VPAC2  
371 mRNA was detected in airway epithelial, glandular, and immune cells of the lung  
372 <sup>36</sup>. Therefore, while the inhibition curve of SARS-CoV-2 by VIP and PACAP in  
373 Calu-3 cells points to different optimal doses than those obtained for monocytes, it  
374 is possible that in normal lung cells and tissue, VIP and PACAP could present a  
375 broader range of action in the inhibition of SARS-CoV-2. In fact, VIP and specific  
376 agonists for VPAC1 or VPAC2 have been proposed and tested for respiratory  
377 conditions, like asthma <sup>74-76</sup>, pulmonary arterial hypertension (PAH) <sup>74,77,78</sup> and  
378 chronic obstructive pulmonary disease (COPD) <sup>74,75,79</sup>, demonstrating that the anti-  
379 inflammatory actions of VIP/PACAP can be achieved in lung tissues. Future  
380 studies should define which of these receptors would preferentially be activated by  
381 specific agonists to restrain SARS-CoV-2 replication in lungs or other sites.  
382 Together with the possible differences of receptor expression and self-regulatory  
383 characteristics of GPCRs, a third regulation level of VIP and PACAP action on  
384 pulmonary cells can be achieved by the activity of proteases and peptidases, as  
385 lungs are described to express high levels of several of them in both normal and  
386 pathological conditions <sup>38-40</sup>. Some of these peptidases could target VIP and  
387 PACAP, thus altering the ligand/receptor ratio and modulating the signaling  
388 pathways.

389           The improvement of VIP and PACAP action on SARS-CoV-2 inhibition in  
390 Calu-3 cells when combined with Bestatin, suggests that some aminopeptidases  
391 are involved in the processing or degradation of these neuropeptides. Likewise,  
392 the finding that the anti-SARS-CoV-2 effect of both neuropeptides is enhanced  
393 when they were combined with RTV, which *per se* did not inhibit SARS-CoV-2  
394 replication but can inhibit cellular peptidases <sup>43</sup>, supports the view that a possible  
395 clinical use of VIP or PACAP for COVID-19 treatment would be aided by a  
396 concomitant inhibition of aminopeptidases. In fact, Bestatin (Ubenimex) has  
397 already been evaluated for clinical use for some types of cancer and  
398 cardiovascular diseases, with no significant side effects <sup>80,81</sup>. The strong inhibition  
399 of virus production resulting from the combination of VIP and PACAP with  
400 remdesivir raises the possibility that the direct inhibition of SARS-CoV-2  
401 transcription by this antiviral could alleviate the excessive metabolic burden on  
402 cellular processes, due to sheer reduction of viral load in the infected cells,  
403 ultimately favoring the antiviral and anti-inflammatory actions of VIP and PACAP  
404 on these cells.

405           Since up to now there are no antivirals specific to SARS-CoV-2, and that  
406 the hyper-inflammation may persist even after the lowering of the viral load, the  
407 searching for compounds that target the aberrant production of proinflammatory  
408 cytokines and, simultaneously, the own viral replication, should be stimulated. Our  
409 present results showing that VIP and PACAP hold these two critical activities point  
410 these neuropeptides or their analogue molecules as potential therapeutic agents  
411 for COVID-19.

## 412 **Materials and Methods**

413 **Cells, virus and reagents.** African green monkey kidney cells (Vero, subtype E6)  
414 and human lung epithelial cell lines (Calu-3) were expanded in high glucose  
415 DMEM (Vero) or MEM (Calu-3) with 10% fetal bovine serum (FBS; HyClone), with  
416 100 U/mL penicillin and 100 µg/mL streptomycin (Pen/Strep; Gibco) at 37°C in a  
417 humidified atmosphere with 5% CO<sub>2</sub>.

418 Peripheral blood mononuclear cells (PBMCs) were isolated by density gradient  
419 centrifugation (Ficoll-Paque, GE Healthcare) from buffy-coat preparations of blood  
420 from healthy donors. PBMCs (2 x 10<sup>6</sup> cells) were plated onto 48-well plates  
421 (NalgeNunc) in RPMI-1640 with 5% inactivated male human AB serum (Merck) for  
422 3 hours. Non-adherent cells were removed and the remaining monocytes were  
423 maintained in DMEM (low-glucose) with 5% human serum (Merck) and 100 U/mL  
424 penicillin and 100 µg/mL streptomycin (Pen/Strep; Gibco). The purity of human  
425 monocytes was above 90%, as determined by flow cytometric analysis (FACScan;  
426 Becton Dickinson) using anti-CD3 (BD Biosciences) and anti-CD14 (BD  
427 Biosciences) monoclonal antibodies.

428 SARS-CoV-2 was expanded in Vero E6 cells from an isolate contained on a  
429 nasopharyngeal swab obtained from a confirmed case in Rio de Janeiro, Brazil  
430 (GenBank accession no. MT710714). Viral isolation was performed after a single  
431 passage in a cell culture in a 150 cm<sup>2</sup> flasks with high glucose DMEM plus 2%  
432 FBS. Observations for cytopathic effects were performed daily and peaked 4 to 5  
433 days after infection. All procedures related to virus culture were handled in  
434 biosafety level 3 (BSL3) multiuser facilities according to WHO guidelines. Virus

435 titers were determined as plaque forming units (PFU/mL), and virus stocks were  
436 kept in -80°C ultralow freezers.

437 The neuropeptides VIP and PACAP and the VPAC1 and VPAC2 agonists  
438 (Ala<sup>11,22,28</sup>)-VIP and Bay 55-9837, respectively, were purchased from Tocris. The  
439 PAC1 agonist Maxadilan was kindly donated by Dr. Ethan A. Lerner (Department  
440 of Dermatology, Massachusetts General Hospital, MA, USA). All peptides and  
441 agonists were diluted in PBS. The antivirals atazanavir (ATV), ritonavir (RTV) and  
442 remdesivir (RDV) were purchased from Selleckchem, dissolved in 100%  
443 dimethylsulfoxide (DMSO) and subsequently diluted at least 10<sup>4</sup>-fold in culture or  
444 reaction medium before each assay. The final DMSO concentrations showed no  
445 cytotoxicity.

446 **Infections and virus titration.** Infections were performed with SARS-CoV-2 at  
447 MOI of 0.01 (monocytes) or 0.1 (Calu-3) in low (monocytes) or high (Calu-3)  
448 glucose DMEM without serum. After 1 hour, cells were washed and incubated with  
449 complete medium with treatments or not. For virus titration, monolayers of Vero E6  
450 cells (2 x 10<sup>4</sup> cell/well) in 96-well plates were infected with serial dilutions of  
451 supernatants containing SARS-CoV-2 for 1 hour at 37°C. Semi-solid high glucose  
452 DMEM medium containing 2% FSB and 2.4% carboxymethylcellulose was added  
453 and cultures were incubated for 3 days at 37 °C. Then, the cells were fixed with  
454 10% formalin for 2 hour at room temperature. The cell monolayer was stained with  
455 0.04% solution of crystal violet in 20% ethanol for 1 hour. Plaque numbers were  
456 scored in at least 3 replicates per dilution by independent readers blinded to the  
457 experimental group and the virus titers were determined by plaque-forming units  
458 (PFU) per milliliter.

459 **Molecular detection of virus RNA levels.** The total RNA was extracted from  
 460 cultures using QIAamp Viral RNA (Qiagen®), according to manufacturer's  
 461 instructions. Quantitative RT-PCR was performed using QuantiTect Probe RT-  
 462 PCR Kit (Quiagen®) in a StepOnePlus™ Real-Time PCR System (Thermo Fisher  
 463 Scientific). Amplifications were carried out in 15 µL reaction mixtures containing 2x  
 464 reaction mix buffer, 50 µM of each primer, 10 µM of probe, and 5 µL of RNA  
 465 template. Primers, probes, and cycling conditions recommended by the Centers  
 466 for Disease Control and Prevention (CDC) protocol were used to detect the SARS-  
 467 CoV-2<sup>82</sup>. The standard curve method was employed for virus quantification. For  
 468 reference to the cell amounts used, the housekeeping gene RNase P was  
 469 amplified. The Ct values for this target were compared to those obtained to  
 470 different cell amounts, 10<sup>7</sup> to 10<sup>2</sup>, for calibration.

471 **SDS-PAGE and Western blot for SREBPs.** After 24h of SARS-CoV-2 infection,  
 472 monocytes were harvested using ice-cold lysis buffer (1% Triton X-100, 2% SDS,  
 473 150 mM NaCl, 10 mM HEPES, 2 mM EDTA containing protease inhibitor cocktail -  
 474 Roche). Cell lysates were heated at 100 °C for 5 min in the presence of Laemmli  
 475 buffer (20% β-mercaptoethanol; 370 mM Tris base; 160 µM bromophenol blue; 6%  
 476 glycerol; 16% SDS; pH 6.8), and 20 µg of protein/sample were resolved by  
 477 electrophoresis on SDS-containing 10% polyacrylamide gel (SDS-PAGE). After  
 478 electrophoresis, the separated proteins were transferred to nitrocellulose  
 479 membranes and incubated in blocking buffer (5% nonfat milk, 50 mM Tris-HCl,  
 480 150 mM NaCl, and 0.1% Tween 20). Membranes were probed overnight with the  
 481 following antibodies: anti-SREBP-1 (Proteintech #14088-1-AP), anti-SREBP-2  
 482 (Proteintech #28212-1-AP) and anti-β-actin (Sigma, #A1978). After the washing  
 483 steps, they were incubated with IRDye - LICOR or HRP-conjugated secondary

antibodies. All antibodies were diluted in blocking buffer. The detections were performed by Supersignal Chemiluminescence (GE Healthcare) or by fluorescence imaging using the Odyssey system. The densitometries were analyzed using the Image Studio Lite Ver 5.2 software.

**Measurements of inflammatory mediators, cell death, NF-kBp65, CREB and neuropeptides.** The levels of IL-6, IL-8, TNF- $\alpha$  and MIF were quantified in the supernatants from uninfected and SARS-CoV-2-infected Calu-3 cells and monocytes by ELISA (R&D Systems), following manufacturer's instructions, and results are expressed as percentages relative to uninfected cells. Cell death was determined according to the activity of lactate dehydrogenase (LDH) in the culture supernatants using a CytoTox® Kit (Promega, USA) according to the manufacturer's instructions. Results are expressed as percentages of released LDH compared to control cells lysed with 0.8% Triton X-100. Supernatants were centrifuged at 5,000 rpm for 1 minute, to remove cellular debris. Evaluation of NF-kBp65 and CREB activation was performed in infected or uninfected monocytes using NFkB p65 (Total/Phospho) InstantOne™ and CREB (Total/Phospho) Multispecies InstantOne™ ELISA Kits (Thermo Fisher), according to manufacturer's instructions. VIP and PACAP levels were quantified in the plasma from patients or control volunteers using standard commercially available ELISA and EIA Kits, according to the manufacturer's instructions (Abelisa).

**Human subjects.** We prospectively enrolled severe or mild/asymptomatic COVID-19 RT-PCR-confirmed cases, and SARS-CoV-2-negative controls. Blood and respiratory samples were obtained from the 24 patients with severe COVID-19 within 72 hours from intensive care unit (ICU) admission in two reference centers

(Instituto Estadual do Cérebro Paulo Niemeyer and Hospital Copa Star, Rio de Janeiro, Brazil). Severe COVID-19 was defined as those critically ill patients presenting viral pneumonia on computed tomography scan and requiring oxygen supplementation through either a nonrebreather mask or mechanical ventilation. Four outpatients presenting mild self-limiting COVID-19 syndrome, and two SARS-CoV-2-positive asymptomatic subjects were also included. All patients had SARS-CoV-2 confirmed diagnostic through RT-PCR of nasal swab or tracheal aspirates. Peripheral vein blood was also collected from 10 SARS-CoV-2-negative healthy participants as tested by RT-PCR on the day of blood sampling. The characteristics of severe (n=24), mild/asymptomatic (n=6) and healthy (n=10) participants are presented in **Table 1**. Mild and severe COVID-19 patients presented differences regarding the age and the presence of comorbidities as obesity, cardiovascular diseases and diabetes (**Table 1**), which is consistent with previously reported patient cohorts <sup>2,83–85</sup>. The SARS-CoV-2-negative control group, however, included subjects of older age and chronic non-communicable diseases, so it is matched with mild and critical COVID-19 patients, except for hypertension (**Table 1**). All ICU-admitted patients received usual supportive care for severe COVID-19 and respiratory support with either noninvasive oxygen supplementation (n=5) or mechanical ventilation (n=19) (**Supplemental Table 1**). Patients with acute respiratory distress syndrome (ARDS) were managed with neuromuscular blockade and a protective ventilation strategy that included low tidal volume (6 mL/kg of predicted body weight) and limited driving pressure (less than 16 cmH<sub>2</sub>O) as well as optimal PEEP calculated based on the best lung compliance and PaO<sub>2</sub>/FiO<sub>2</sub> ratio. In those with severe ARDS and PaO<sub>2</sub>/FiO<sub>2</sub> ratio below 150 despite optimal ventilatory settings, prone position was initiated. Our

management protocol included antithrombotic prophylaxis with enoxaparin 40 to 60 mg per day. Patients did not receive routine steroids, antivirals or other anti-inflammatory or anti-platelet drugs. The SARS-CoV-2-negative control participants were not under anti-inflammatory or anti-platelet drugs for at least two weeks. All clinical information was prospectively collected using a standardized form - ISARIC/WHO Clinical Characterization Protocol for Severe Emerging Infections (CCPBR). Clinical and laboratory data were recorded on admission in all severe patients included in the study and the primary outcome analyzed was 28-day mortality (n = 11 survivors and 13 non-survivors, **Supplemental Table 2**). Age and the frequency of comorbidities were not different between severe patients requiring mechanical ventilation or noninvasive oxygen supplementation neither between survivors and non-survivors (**Supplemental Table 1 and 2**).

**Statistical analysis.** Statistics were performed using GraphPad Prism software version 8. All the numerical variables were tested regarding their distribution using the Shapiro-Wilk test. One-way analysis of variance (ANOVA) was used to compare differences among 3 groups following a normal (parametric) distribution, and Tukey's post-hoc test was used to locate the differences between the groups; or Friedman's test (for non-parametric data) with Dunn's post-hoc test. Comparisons between 2 groups were performed using the Student t test for parametric distributions or the Mann-Whitney U test for nonparametric distributions. Correlation coefficients were calculated using Pearson's correlation test for parametric distributions and the Spearman's correlation test for nonparametric distributions.



556 **Study approval.** Experimental procedures involving human cells from healthy  
557 donors were performed with samples obtained after written informed consent and  
558 were approved by the Institutional Review Board (IRB) of the Oswaldo Cruz  
559 Institute/Fiocruz (Rio de Janeiro, RJ, Brazil) under the number 397-07. The  
560 National Review Board approved the study protocol (CONEP  
561 30650420.4.1001.0008) for clinical samples, and informed consent was obtained  
562 from all participants or patients' representatives.

### 563 **Acknowledgments and funding**

564 We thank the Hemotherapy Service from Hospital Clementino Fraga Filho  
565 (Federal University of Rio de Janeiro, Brazil) for providing buffy-coats. Dr. Andre  
566 Sampaio from Farmanguinhos, platform RPT11M, and Dr. Lucio Mendes Cabral  
567 from Department of Drugs and Pharmaceutics, Faculty of Pharmacy, Federal  
568 University of Rio de Janeiro (UFRJ) are acknowledged for kindly donating the  
569 Calu-3 cell. The recombinant protein Maxadilan was kindly donated to us by Dr.  
570 Ethan A. Lerner (Department of Dermatology, Massachusetts General Hospital,  
571 MA, USA). The authors are thankful to Prof. Elvira M. Saraiva (Federal University  
572 of Rio de Janeiro, Brazil) for stimulating comments and invaluable suggestions.  
573 This work was supported by Conselho Nacional de Desenvolvimento Científico e  
574 Tecnológico (CNPq), Fundação de Amparo à Pesquisa do Estado do Rio de  
575 Janeiro (FAPERJ), and by Mercosur Structural Convergence Fund (FOCEM,  
576 Mercosur, grant number 03/11). This study was financed in part by the  
577 Coordenação de Aperfeiçoamento de Pessoal de Nível Superior - Brasil (CAPES),  
578 Finance Code 001. Funding was also provided by CNPq, CAPES and FAPERJ  
579 through the National Institutes of Science and Technology Program (INCT) to

580 Carlos Morel (INCT-IDPN) and Wilson Savino (INCT-NIM). Thanks are due to  
581 Oswaldo Cruz Foundation/Fiocruz under the auspicious of Inova program. The  
582 funding sponsors had no role in the design of the study; in the collection, analyses,  
583 or interpretation of data; in the writing of the manuscript, and in the decision to  
584 publish the results. The authors declare no competing financial interests.

## 585 **Author Contribution**

586 Conceived the study: JRT, TMLS, DCBH; Designed the experiments: JRT, PTB,  
587 TMLS, DCBH; Performed the experiments: JRT, CQS, NFR, CRRP, CSF, SSGD,  
588 ACF, MM, VCS, LT, IGAQ, EDH, PK; Analyzed the data: JRT, PTB, IGAQ, EDH,  
589 PK, FAB, TMLS, DCBH; Wrote the paper: JRT, PTB, TMLS, DCBH. All authors  
590 reviewed and approved the manuscript.

## 591 **References**

- 592 1. García, L. F. Immune Response, Inflammation, and the Clinical Spectrum of COVID-19.  
593 *Front. Immunol.* **11**, (2020).
- 594 2. Huang, C. *et al.* Clinical features of patients infected with 2019 novel coronavirus in  
595 Wuhan, China. *Lancet* **395**, 497–506 (2020).
- 596 3. Chen, G. *et al.* Clinical and immunological features of severe and moderate coronavirus  
597 disease 2019. *J. Clin. Invest.* **130**, 2620–2629 (2020).
- 598 4. Gupta, A. *et al.* Extrapulmonary manifestations of COVID-19. *Nat. Med.* **26**, 1017–1032  
599 (2020).
- 600 5. Tang, D., Comish, P. & Kang, R. The hallmarks of COVID-19 disease. *PLoS Pathogens* vol. 16  
601 e1008536 (2020).
- 602 6. Ragab, D., Salah Eldin, H., Taeimah, M., Khattab, R. & Salem, R. The COVID-19 Cytokine  
603 Storm; What We Know So Far. *Front. Immunol.* **11**, (2020).
- 604 7. Giamarellos-Bourboulis, E. J. *et al.* Complex Immune Dysregulation in COVID-19 Patients  
605 with Severe Respiratory Failure. *Cell Host Microbe* **27**, 992-1000.e3 (2020).
- 606 8. Blanco-Melo, D. *et al.* Imbalanced Host Response to SARS-CoV-2 Drives Development of  
607 COVID-19. *Cell* **181**, 1036-1045.e9 (2020).
- 608 9. Veras, F. P. *et al.* SARS-CoV-2-triggered neutrophil extracellular traps mediate COVID-19

609 pathology. *J. Exp. Med.* **217**, (2020).

610 10. Radermecker, C. *et al.* Neutrophil extracellular traps infiltrate the lung airway, interstitial,  
611 and vascular compartments in severe COVID-19. *J. Exp. Med.* **217**, (2020).

612 11. Skendros, P. *et al.* Complement and tissue factor–enriched neutrophil extracellular traps  
613 are key drivers in COVID-19 immunothrombosis. *J. Clin. Invest.* **130**, 6151–6157 (2020).

614 12. Middleton, E. A. *et al.* Neutrophil extracellular traps contribute to immunothrombosis in  
615 COVID-19 acute respiratory distress syndrome. *Blood* **136**, 1169–1179 (2020).

616 13. Rodrigues, T. S. *et al.* Inflammasomes are activated in response to SARS-CoV-2 infection  
617 and are associated with COVID-19 severity in patients. *J. Exp. Med.* **218**, (2021).

618 14. Ferreira, A. C. *et al.* SARS-CoV-2 induces inflammasome-dependent pyroptosis and  
619 downmodulation of HLA-DR in human monocytes. *medRxiv* 2020.08.25.20182055 (2020)  
620 doi:10.1101/2020.08.25.20182055.

621 15. Nicholls, J. M. *et al.* Lung pathology of fatal severe acute respiratory syndrome. *Lancet* **361**,  
622 1773–1778 (2003).

623 16. Gu, J. *et al.* Multiple organ infection and the pathogenesis of SARS. *J. Exp. Med.* **202**, 415–  
624 424 (2005).

625 17. Merad, M. & Martin, J. C. Pathological inflammation in patients with COVID-19: a key role  
626 for monocytes and macrophages. *Nat. Rev. Immunol.* **20**, 355–362 (2020).

627 18. Schurink, B. *et al.* Viral presence and immunopathology in patients with lethal COVID-19: a  
628 prospective autopsy cohort study. *The Lancet Microbe* **1**, e290–e299 (2020).

629 19. Chiang, C.-C., Korinek, M., Cheng, W.-J. & Hwang, T.-L. Targeting Neutrophils to Treat  
630 Acute Respiratory Distress Syndrome in Coronavirus Disease. *Front. Pharmacol.* **11**, 1576  
631 (2020).

632 20. Zhou, J. *et al.* Active replication of middle east respiratory syndrome coronavirus and  
633 aberrant induction of inflammatory cytokines and chemokines in human macrophages:  
634 Implications for pathogenesis. *J. Infect. Dis.* **209**, 1331–1342 (2014).

635 21. Tynell, J. *et al.* Middle east respiratory syndrome coronavirus shows poor replication but  
636 significant induction of antiviral responses in human monocyte-derived macrophages and  
637 dendritic cells. *J. Gen. Virol.* **97**, 344–355 (2016).

638 22. Dickson, L. & Finlayson, K. VPAC and PAC receptors: From ligands to function. *Pharmacol*  
639 *Ther* **121**, 294–316 (2009).

640 23. Ganea, D. & Delgado, M. Vasoactive intestinal peptide (VIP) and pituitary adenylate  
641 cyclase-activating polypeptide (PACAP) as modulators of both innate and adaptive  
642 immunity. *Crit Rev Oral Biol Med* **13**, 229–237 (2002).

643 24. Kim, W. K. *et al.* Vasoactive intestinal peptide and pituitary adenylyl cyclase-activating  
644 polypeptide inhibit tumor necrosis factor- $\alpha$  production in injured spinal cord and in  
645 activated microglia via a cAMP-dependent pathway. *J. Neurosci.* **20**, 3622–3630 (2000).

646 25. Larocca, L., Calafat, M., Roca, V., Franchi, A. M. & Leiros, C. P. VIP limits LPS-induced nitric  
647 oxide production through IL-10 in NOD mice. *Int Immunopharmacol* **7**, 1343–1349 (2007).

- 648 26. Gonzalez-Rey, E. & Delgado, M. Vasoactive intestinal peptide inhibits cyclooxygenase-2  
649 expression in activated macrophages, microglia, and dendritic cells. *Brain. Behav. Immun.*  
650 **22**, 35–41 (2008).
- 651 27. Delgado, M., Munoz-Elias, E. J., Gomariz, R. P. & Ganea, D. VIP and PACAP inhibit IL-12  
652 production in LPS-stimulated macrophages. Subsequent effect on IFN $\gamma$  synthesis by T cells.  
653 *J. Neuroimmunol.* **96**, 167–181 (1999).
- 654 28. Delgado, M., Munoz-Elias, E. J., Gomariz, R. P. & Ganea, D. Vasoactive intestinal peptide  
655 and pituitary adenylate cyclase-activating polypeptide prevent inducible nitric oxide  
656 synthase transcription in macrophages by inhibiting NF-kappa B and IFN regulatory factor 1  
657 activation. *J. Immunol.* **162**, 4685–96 (1999).
- 658 29. Moody, T. W., Ito, T., Osefo, N. & Jensen, R. T. VIP and PACAP: recent insights into their  
659 functions/roles in physiology and disease from molecular and genetic studies. *Curr Opin*  
660 *Endocrinol Diabetes Obes* **18**, 61–67 (2011).
- 661 30. Gonzalez-Rey, E., Varela, N., Chorny, A. & Delgado, M. Therapeutic Approaches of  
662 Vasoactive Intestinal Peptide as a Pleiotropic Immunomodulator. *Curr. Pharm. Des.* **13**,  
663 1113–1139 (2007).
- 664 31. Pozo, D. *et al.* Tuning immune tolerance with vasoactive intestinal peptide: A new  
665 therapeutic approach for immune disorders. *Peptides* **28**, 1833–1846 (2007).
- 666 32. Temerozo, J. R. J. R., Joaquim, R., Regis, E. G. E. G., Savino, W. & Bou-Habib, D. C. D. C. D. C.  
667 Macrophage Resistance to HIV-1 Infection Is Enhanced by the Neuropeptides VIP and  
668 PACAP. *PLoS One* **8**, (2013).
- 669 33. Temerozo, J. R. J. R. *et al.* The Neuropeptides Vasoactive Intestinal Peptide and Pituitary  
670 Adenylate Cyclase-Activating Polypeptide Control HIV-1 Infection in Macrophages Through  
671 Activation of Protein Kinases A and C. *Front. Immunol.* **9**, (2018).
- 672 34. Dérand, R. *et al.* Activation of VPAC 1 receptors by VIP and PACAP-27 in human bronchial  
673 epithelial cells induces CFTR-dependent chloride secretion. *Br. J. Pharmacol.* **141**, 698–708  
674 (2004).
- 675 35. Busto, R., Prieto, J. C., Bodega, G., Zapatero, J. & Carrero, I. Immunohistochemical  
676 localization and distribution of VIP/PACAP receptors in human lung. *Peptides* **21**, 265–269  
677 (2000).
- 678 36. Groneberg, D. A., Hartmann, P., Dinh, Q. T. & Fischer, A. Expression and distribution of  
679 vasoactive intestinal polypeptide receptor VPAC2 mRNA in human airways. *Lab. Investig.*  
680 **81**, 749–755 (2001).
- 681 37. Fagerberg, L. *et al.* Analysis of the human tissue-specific expression by genome-wide  
682 integration of transcriptomics and antibody-based proteomics. *Mol. Cell. Proteomics* **13**,  
683 397–406 (2014).
- 684 38. Van Der Velden, V. H. J. *et al.* Expression of aminopeptidase N and dipeptidyl peptidase IV  
685 in the healthy and asthmatic bronchus. *Clin. Exp. Allergy* **28**, 110–120 (1998).
- 686 39. Drey Mueller, D., Uhlig, S. & Ludwig, A. ADAM-family metalloproteinases in lung  
687 inflammation: potential therapeutic targets. *Am. J. Physiol. Cell. Mol. Physiol.* **308**, L325–  
688 L343 (2015).

- 689 40. Bonda, W. L. M., Iochmann, S., Magnen, M., Courty, Y. & Reverdiau, P. Kallikrein-related  
690 peptidases in lung diseases. *Biol. Chem.* **399**, 959–971 (2018).
- 691 41. Kolb, A. F. *et al.* Molecular analysis of the coronavirus-receptor function of aminopeptidase  
692 N. *Adv. Exp. Med. Biol.* **440**, 61–7 (1998).
- 693 42. Ou, X. *et al.* Characterization of spike glycoprotein of SARS-CoV-2 on virus entry and its  
694 immune cross-reactivity with SARS-CoV. *Nat. Commun.* **11**, 1620 (2020).
- 695 43. Kourjian, G. *et al.* Sequence-Specific Alterations of Epitope Production by HIV Protease  
696 Inhibitors. *J. Immunol.* **192**, 3496–3506 (2014).
- 697 44. Fintelman-Rodrigues, N. *et al.* Atazanavir, alone or in combination with ritonavir, inhibits  
698 SARS-CoV-2 replication and proinflammatory cytokine production. *Antimicrob. Agents*  
699 *Chemother.* **64**, (2020).
- 700 45. Puijssers, A. J. *et al.* Remdesivir Inhibits SARS-CoV-2 in Human Lung Cells and Chimeric  
701 SARS-CoV Expressing the SARS-CoV-2 RNA Polymerase in Mice. *Cell Rep.* **32**, 107940  
702 (2020).
- 703 46. Delgado, M., Garrido, E., Martinez, C., Leceta, J. & Gomariz, R. P. Vasoactive intestinal  
704 peptide and pituitary adenylate cyclase-activating polypeptides (PACAP27) and PACAP38)  
705 protect CD4+CD8+ thymocytes from glucocorticoid-induced apoptosis. *Blood* **87**, 5152–  
706 5161 (1996).
- 707 47. Liu, T., Zhang, L., Joo, D. & Sun, S.-C. NF-κB signaling in inflammation. *Signal Transduct.*  
708 *Target. Ther.* **2**, 17023 (2017).
- 709 48. Schomerus, C., Maronde, E., Laedtke, E. & Korf, H. W. Vasoactive intestinal peptide (VIP)  
710 and pituitary adenylate cyclase-activating polypeptide (PACAP) induce phosphorylation of  
711 the transcription factor CREB in subpopulations of rat pinealocytes: immunocytochemical  
712 and immunochemical evidence. *Cell Tissue Res* **286**, 305–313 (1996).
- 713 49. Matt, T. Transcriptional control of the inflammatory response: a role for the CREB-binding  
714 protein (CBP). *Acta Med Austriaca* **29**, 77–79 (2002).
- 715 50. Wen, A. Y., Sakamoto, K. M. & Miller, L. S. The Role of the Transcription Factor CREB in  
716 Immune Function. *J. Immunol.* **185**, 6413–6419 (2010).
- 717 51. Shenkar, R., Yum, H.-K., Arcaroli, J., Kupfner, J. & Abraham, E. Interactions between CBP,  
718 NF-κB, and CREB in the lungs after hemorrhage and endotoxemia. *Am. J. Physiol. Cell. Mol.*  
719 *Physiol.* **281**, L418–L426 (2001).
- 720 52. Toth, J. I., Datta, S., Athanikar, J. N., Freedman, L. P. & Osborne, T. F. Selective Coactivator  
721 Interactions in Gene Activation by SREBP-1a and -1c. *Mol. Cell. Biol.* **24**, 8288–8300 (2004).
- 722 53. Yuan, S. *et al.* SREBP-dependent lipidomic reprogramming as a broad-spectrum antiviral  
723 target. *Nat. Commun.* **10**, 120 (2019).
- 724 54. Cloherty, A. P. M., Olmstead, A. D., Ribeiro, C. M. S. & Jean, F. Hijacking of Lipid Droplets by  
725 Hepatitis C, Dengue and Zika Viruses—From Viral Protein Moonlighting to Extracellular  
726 Release. *Int. J. Mol. Sci.* **21**, 7901 (2020).
- 727 55. Taylor, H. E., Linde, M. E., Khatua, A. K., Popik, W. & Hildreth, J. E. K. Sterol Regulatory  
728 Element-Binding Protein 2 Couples HIV-1 Transcription to Cholesterol Homeostasis and T

- 729 Cell Activation. *J. Virol.* **85**, 7699–7709 (2011).
- 730 56. Dias, S. da S. G. *et al.* Lipid droplets fuel SARS-CoV-2 replication and production of  
731 inflammatory mediators. *PLOS Pathog.* **16**, e1009127 (2020).
- 732 57. Lee, W. *et al.* COVID-19-activated SREBP2 disturbs cholesterol biosynthesis and leads to  
733 cytokine storm. *Signal Transduct. Target. Ther.* **5**, (2020).
- 734 58. NCT0431169. Intravenous Aviptadil for Critical COVID-19 With Respiratory Failure.  
735 [ClinicalTrials.gov] Bethesda (MD): National Library of Medicine (US).  
736 <https://clinicaltrials.gov/ct2/show/NCT04311697>.
- 737 59. NCT04536350. Inhaled Aviptadil for the Treatment of Moderate and Severe COVID-19.  
738 [ClinicalTrials.gov] Bethesda (MD): National Library of Medicine (US).  
739 <https://clinicaltrials.gov/ct2/show/NCT04360096>.
- 740 60. Said, S. I. The discovery of VIP: Initially looked for in the lung, isolated from intestine, and  
741 identified as a neuropeptide. *Peptides* **28**, 1620–1621 (2007).
- 742 61. Delgado, M., Munoz-Elias, E. J., Martinez, C., Gomariz, R. P. & Ganea, D. VIP and PACAP38  
743 modulate cytokine and nitric oxide production in peritoneal. *Ann N Y Acad Sci* **897**, 401–  
744 414 (1999).
- 745 62. Parry, G. C. & Mackman, N. Role of cyclic AMP response element-binding protein in cyclic  
746 AMP inhibition of NF-kappaB-mediated transcription. *J. Immunol.* **159**, 5450–6 (1997).
- 747 63. Ollivier, V., Parry, G. C. N., Cobb, R. R., de Prost, D. & Mackman, N. Elevated Cyclic AMP  
748 Inhibits NF-kB-mediated Transcription in Human Monocytic Cells and Endothelial Cells. *J.*  
749 *Biol. Chem.* **271**, 20828–20835 (1996).
- 750 64. Luan, B. *et al.* CREB pathway links PGE2 signaling with macrophage polarization. *Proc. Natl.*  
751 *Acad. Sci. U. S. A.* **112**, 15642–15647 (2015).
- 752 65. Zhao, L. Suppression of Proinflammatory Cytokines Interleukin-1 and Tumor Necrosis  
753 Factor- in Astrocytes by a V1 Vasopressin Receptor Agonist: A cAMP Response Element-  
754 Binding Protein-Dependent Mechanism. *J. Neurosci.* **24**, 2226–2235 (2004).
- 755 66. Morris, R. H. K. *et al.* DPPC regulates COX-2 expression in monocytes via phosphorylation  
756 of CREB. *Biochem. Biophys. Res. Commun.* **370**, 174–178 (2008).
- 757 67. Ernst, O. *et al.* Exclusive Temporal Stimulation of IL-10 Expression in LPS-Stimulated Mouse  
758 Macrophages by cAMP Inducers and Type I Interferons. *Front. Immunol.* **10**, 1788 (2019).
- 759 68. Barátki, B. L., Huber, K., Sármay, G., Matkó, J. & Kövesdi, D. Inflammatory signal induced IL-  
760 10 production of marginal zone B-cells depends on CREB. *Immunol. Lett.* **212**, 14–21  
761 (2019).
- 762 69. Avni, D., Ernst, O., Philosoph, A. & Zor, T. Role of CREB in modulation of TNF $\alpha$  and IL-10  
763 expression in LPS-stimulated RAW264.7 macrophages. *Mol. Immunol.* **47**, 1396–1403  
764 (2010).
- 765 70. Park, J. M. *et al.* Signaling Pathways and Genes that Inhibit Pathogen-Induced Macrophage  
766 Apoptosis— CREB and NF-kB as Key Regulators. *Immunity* **23**, 319–329 (2005).
- 767 71. Cheng, J. C. *et al.* CREB is a critical regulator of normal hematopoiesis and leukemogenesis.  
768 *Blood* **111**, 1182–1192 (2008).

- 769 72. Shimano, H. & Sato, R. SREBP-regulated lipid metabolism: convergent physiology —  
770 divergent pathophysiology. *Nat. Rev. Endocrinol.* **13**, 710–730 (2017).
- 771 73. Harikumar, K. G., Morfis, M. M., Lisenbee, C. S., Sexton, P. M. & Miller, L. J. Constitutive  
772 formation of oligomeric complexes between family B G protein-coupled vasoactive  
773 intestinal polypeptide and secretin receptors. *Mol Pharmacol* **69**, 363–373 (2006).
- 774 74. Wu, D., Lee, D. & Sung, Y. K. Prospect of vasoactive intestinal peptide therapy for  
775 COPD/PAH and asthma: a review. *Respir. Res.* **12**, 45 (2011).
- 776 75. Onoue, S., Yamada, S. & Yajima, T. Bioactive analogues and drug delivery systems of  
777 vasoactive intestinal peptide (VIP) for the treatment of asthma/COPD. *Peptides* **28**, 1640–  
778 1650 (2007).
- 779 76. Lindén, A. *et al.* Bronchodilation by an inhaled VPAC2 receptor agonist in patients with  
780 stable asthma. *Thorax* **58**, 217–221 (2003).
- 781 77. Hamidi, S. A. *et al.* VIP and endothelin receptor antagonist: An effective combination  
782 against experimental pulmonary arterial hypertension. *Respir. Res.* **12**, (2011).
- 783 78. Hilaire, R. C., Murthya, S. N., Kadowitza, P. J. & Jeter, J. R. Role of VPAC1 and VPAC2 in VIP  
784 mediated inhibition of rat pulmonary artery and aortic smooth muscle cell proliferation.  
785 *Peptides* **31**, 1517–1522 (2010).
- 786 79. Burian, B., Angela, S., Nadler, B., Petkov, V. & Block, L. H. Inhaled Vasoactive Intestinal  
787 Peptide (VIP) improves the 6-minute walk test and quality of life in patients with COPD:  
788 The VIP/COPD-trial. *Chest* **130**, 121S (2006).
- 789 80. Wakita, A. *et al.* Randomized comparison of fixed-schedule versus response-oriented  
790 individualized induction therapy and use of ubenimex during and after consolidation  
791 therapy for elderly patients with acute myeloid leukemia: the JALSG GML200 Study. *Int. J.*  
792 *Hematol.* **96**, 84–93 (2012).
- 793 81. Ichinose, Y. *et al.* Randomized double-blind placebo-controlled trial of bestatin in patients  
794 with resected stage I squamous-cell lung carcinoma. *J. Natl. Cancer Inst.* **95**, 605–10 (2003).
- 795 82. CDC. Real-time RT-PCR Primers and Probes for COVID-19. *Centers for Disease Control and*  
796 *Prevention* [https://www.cdc.gov/coronavirus/2019-ncov/lab/rt-pcr-panel-primer-](https://www.cdc.gov/coronavirus/2019-ncov/lab/rt-pcr-panel-primer-probes.html)  
797 [probes.html](https://www.cdc.gov/coronavirus/2019-ncov/lab/rt-pcr-panel-primer-probes.html) (2020).
- 798 83. Wu, C. *et al.* Risk Factors Associated With Acute Respiratory Distress Syndrome and Death  
799 in Patients With Coronavirus Disease 2019 Pneumonia in Wuhan, China. *JAMA Intern. Med.*  
800 **180**, 934 (2020).
- 801 84. Shi, S. *et al.* Association of Cardiac Injury With Mortality in Hospitalized Patients With  
802 COVID-19 in Wuhan, China. *JAMA Cardiol.* **5**, 802 (2020).
- 803 85. Guo, T. *et al.* Cardiovascular Implications of Fatal Outcomes of Patients With Coronavirus  
804 Disease 2019 (COVID-19). *JAMA Cardiol.* **5**, 811 (2020).

805

806

## 807 Figure legends

808 **Figure 1. VIP and PACAP inhibit SARS-CoV-2 gene replication in monocytes and**  
 809 **protect the cells from virus-mediated cytopathicity.** (A, B) Monocytes were infected  
 810 with SARS-CoV-2 and exposed to the indicated concentrations of (A) VIP or (B) PACAP.  
 811 Virus RNA synthesis was evaluated by qPCR in the culture supernatants 24 hours after  
 812 infection. (C) Cellular viability was analyzed by measuring LDH release in the  
 813 supernatants of uninfected or SARS-CoV-2-infected monocytes, treated or not with VIP or  
 814 PACAP. (D, E) Similar to A and B, except that cells were treated with agonists for VIP and  
 815 PACAP receptors, as indicated, at different concentrations (D) or with combined  
 816 equivalent doses VIP and PACAP (E). Data in A, B, D and E are shown normalized to  
 817 infected cells kept only with culture medium, and in C represent means  $\pm$  SD of absolute  
 818 values. \* $p \leq .05$ ; \*\* $p \leq .01$ . (A, B)  $n=5$ ; (D)  $n=6$ ; (D, E)  $n=4$

819 **Figure 2. VIP and PACAP inhibit SARS-CoV-2 replication in Calu-3 cells, protect the**  
 820 **cells from virus-mediated cytopathicity, and mediate transmission of viral**  
 821 **resistance from monocytes to human lung cells.** Calu-3 cells were infected by SARS-  
 822 CoV-2 and then left untreated (0) or treated with the indicated concentrations of VIP (A) or  
 823 PACAP (B). After 48 hours, supernatants were collected, and viral replication was  
 824 evaluated by quantifying PFUs in plaque assays. (C) Cellular viability was analyzed by  
 825 measuring LDH release in the supernatants of uninfected or SARS-CoV-2-infected Calu-3  
 826 cells, treated or not with VIP (1 nM) or PACAP (50 nM). (D) Similar to A and B, except that  
 827 cells were treated with agonists for VIP and PACAP receptors, as indicated, at different  
 828 concentrations. (E, three bars on the left) SARS-CoV-2-infected Calu-3 cells were kept  
 829 untreated (Control) or received CM (50% final dilution) from VIP- or PACAP-treated  
 830 uninfected monocytes. (E, three bars on the right) SARS-CoV-2-infected Calu-3 cells were  
 831 kept untreated (Control) or received CM (50% final dilution) from VIP- or PACAP-treated  
 832 SARS-CoV-2-infected monocytes. After 48 hours, supernatants were collected, and viral



833 replication was evaluated by quantifying PFUs in plaque assay. Data are shown as means  
834  $\pm$  SD. \* $p \leq .05$ ; \*\* $p \leq .01$ . (A, B, C, D)  $n=4$ ; (E)  $n=5$

835 **Figure 3. Influence of peptidases on VIP- or PACAP-induced inhibition of SARS-**  
836 **CoV-2 replication in pulmonary cells.** Calu-3 cells were infected with SARS-CoV-2 and  
837 treated with Bestatin at 500 nM (A), or with the indicated concentrations of VIP (B) or  
838 PACAP (C) associated or not with Bestatin 500 nM. After 48 hours, supernatants were  
839 collected, and viral replication was evaluated by quantifying PFUs in plaque assay. Data  
840 are shown as means  $\pm$  SD. \* and + represent  $p \leq .05$  versus control (0), and # represents  
841  $p \leq .05$  of neuropeptide versus neuropeptide + Bestatin at indicated concentrations. (A, B,  
842 C)  $n=4$

843 **Figure 4. Association with antivirals increments the neuropeptide anti-SARS-CoV-2**  
844 **effect in pulmonary cells.** Calu-3 cells were infected with SARS-CoV-2 and treated with  
845 ATV 5  $\mu$ M, RTV 5  $\mu$ M or RDV 0.1  $\mu$ M (A), or with the indicated concentrations of VIP (B)  
846 or PACAP (C) associated or not with ATV, RTV or RDV. After 48 hours, supernatants  
847 were collected, and viral replication was evaluated by quantifying PFUs in plaque assay.  
848 Data are shown as means  $\pm$  SD. \*, +, # and § represent  $p \leq .05$  versus control (0), and "x"  
849 represents  $p \leq .05$  of neuropeptide versus neuropeptide + RTV (5 nM). (A, B, C)  $n=4$

850 **Figure 5. VIP and PACAP reduce production of proinflammatory mediators by**  
851 **SARS-CoV-2-infected monocytes and Calu-3 cells.** Monocytes and Calu-3 cells were  
852 infected with SARS-CoV-2 for 1 hour, and then exposed to VIP or PACAP (10 nM each for  
853 monocytes, 1 nM of VIP or 50 nM of PACAP for Calu-3 cells). The levels of IL-6, IL-8,  
854 TNF- $\alpha$  and MIF were measured in culture supernatants of monocytes after 24 hours (A),  
855 and of IL-6 and IL-8 after 48 hours for Calu-3 cells (B), by ELISA. Data represent means  $\pm$   
856 SD. \* $p \leq .05$ ; \*\* $p \leq .01$ . (A)  $n=6$ ; (B)  $n=4$

**Figure 6. VIP and PACAP regulate the activation of transcription factors in SARS-CoV-2-infected monocytes.** Monocytes were infected by SARS-CoV-2 and, 1 hour later, the infected cells were exposed (or not - Nil) to VIP or PACAP (at 10 nM). After 24 hours, the cells were lysed and the ratios between phosphoNF-kBp65/total NF-kBp65 (A), phosphoCREB/total CREB (B), active SREBP-1/ $\beta$ -actin (C), and active SREBP-2/ $\beta$ -actin (D) were quantified by ELISA (A and B) or by western blot (C and D) in the cell lysates. Data represent means  $\pm$  SD. \* $p \leq .05$ ; \*\* $p \leq .01$ ; \*\*\* $p \leq .001$ . (A, B)  $n=3$ ; (C, D)  $n=4$

**Figure 7. Plasma level of VIP is elevated in patients with severe forms of COVID-19.** The levels of VIP (A) and PACAP (B) in the plasma of SARS-CoV-2-negative control participants, SARS-CoV-2-positive asymptomatic subjects, or symptomatic patients presenting mild to severe COVID-19 syndrome were quantified by ELISA. Correlation between levels of VIP and CRP (C) and levels of both neuropeptides (D) in the plasma from patients with COVID-19. Correlation between viral load and VIP (E) or PACAP (F) in mild and severe patients with detectable swabs samples. (G and I) Severe COVID-19 patients admitted to the ICU were stratified between those requiring invasive mechanical ventilation or noninvasive O<sub>2</sub> supplementation. (H and J) Severe COVID-19 patients were stratified according to the 28-day mortality outcome as survivors or non survivors. One outlier (CRP = 621.64 mg/dL) was excluded from the analysis in panels C-D according to the ROUT test. Linear regression (with the 95 % confidence interval) and Spearman's correlation were calculated according to the distribution of the dots (controls: grey; asymptomatics: brown; mild: green; severe: red). The horizontal lines in the box plots represent the median, the box edges represent the interquartile ranges, and the whiskers indicate the minimal and maximal value in each group. \* $p \leq .05$ ; \*\* $p \leq .01$ .

880

881 **Table 1:** Characteristics of COVID-19 patients and control subjects.

| Characteristics <sup>1</sup>                     | Control<br>(n=10) | Asymptomatic/<br>Mild<br>(n=6) | Severe/critical<br>(n=24) |
|--------------------------------------------------|-------------------|--------------------------------|---------------------------|
| Age, years                                       | 53 (32 – 60)      | 31 (29 – 34)                   | 58 (48 – 66)              |
| Sex, male                                        | 4 (40%)           | 2 (33.3 %)                     | 12 (50 %)                 |
| Respiratory support                              |                   |                                |                           |
| Oxygen supplementation                           | 0 (0%)            | 0 (0%)                         | 5 (20.8%)                 |
| Mechanical ventilation                           | 0 (0%)            | 0 (0%)                         | 19 (79.2%)                |
| SAPS 3                                           | -                 | -                              | 60 (55 – 71)              |
| PaO <sub>2</sub> /FiO <sub>2</sub> ratio         | -                 | -                              | 154 (99 – 373)            |
| Vasopressor                                      | -                 | -                              | 10 (41.6%)                |
| Time from symptom onset<br>to blood sample, days | -                 | 5 (-1 – 7) <sup>2</sup>        | 14 (8 – 17)               |
| 28-day mortality                                 | -                 | -                              | 13 (54.2%)                |
| <b>Comorbidities</b>                             |                   |                                |                           |
| Obesity                                          | 1 (10%)           | 0 (0%)                         | 5 (20.8%)                 |
| Hypertension                                     | 1 (10%)           | 0 (0%)                         | 6 (25%)                   |
| Diabetes                                         | 0 (0%)            | 0 (0%)                         | 9 (37.5%)                 |
| Cancer                                           | 0 (0%)            | 0 (0%)                         | 3 (12.5%)                 |
| Heart disease <sup>3</sup>                       | 0 (0%)            | 0 (0%)                         | 2 (8.3%)                  |
| <b>Presenting symptoms</b>                       |                   |                                |                           |
| Cough                                            | 0 (0%)            | 3 (50%)                        | 17 (70.8%)                |
| Fever                                            | 0 (0%)            | 2 (33.3%)                      | 18 (75%)                  |
| Dyspnea                                          | 0 (0%)            | 0 (0%)                         | 20 (83.3%)                |
| Headache                                         | 0 (0%)            | 2 (33.3%)                      | 3 (12.5%)                 |
| Anosmia                                          | 0 (0%)            | 1 (16.6%)                      | 8 (33.3%)                 |
| <b>Laboratory findings on admission</b>          |                   |                                |                           |
| Leukocytes, x 1000/ $\mu$ L                      | -                 | -                              | 138 (102 – 180)           |
| Lymphocyte, cells/ $\mu$ L                       | -                 | -                              | 1,167 (645 – 1,590)       |
| Monocytes, cells/ $\mu$ L                        | -                 | -                              | 679 (509 – 847)           |
| Platelet count, x 1000/ $\mu$ L                  | -                 | -                              | 169 (137 – 218)           |
| C Reactive Protein, mg/L <sup>4</sup>            | 0.1 (0.1 – 0.18)  | 0.1 (0.1 – 0.11)               | 178 (74 – 308)*           |
| Fibrinogen, mg/dL <sup>4</sup>                   | 281 (232 – 302)   | 229 (197 – 324)                | 528 (366 – 714)*          |
| D-dimer, IU/mL <sup>4</sup>                      | 292 (225 – 476)   | 191 (190 – 291)                | 4836 (2364 – 10816)*      |
| IL-6, pg/mL                                      | 13 (7 – 16)       | 9 (7.7 – 9.2)                  | 33.5 (19.2 – 76.7)*       |

882 <sup>1</sup>Numerical variables are represented as the median and the interquartile range, and  
883 qualitative variables are represented as the number and the percentage.

884 <sup>2</sup>Day of sample collection after the onset of symptoms was not computed for  
885 asymptomatic subjects.

886 <sup>3</sup>Coronary artery disease or congestive heart failure.

887 <sup>4</sup>Reference values of C reactive Protein (0.00 – 1.00), Fibrinogen (238 – 498 mg/dL) and  
888 D-dimer (0 – 500 ng/mL).

889 \*p < 0.05 compared to control. The qualitative variables were compared using the two  
890 tailed Fisher exact test, and the numerical variables using the t test for parametric and the  
891 Mann Whitney U test for nonparametric distributions.

Figure 1

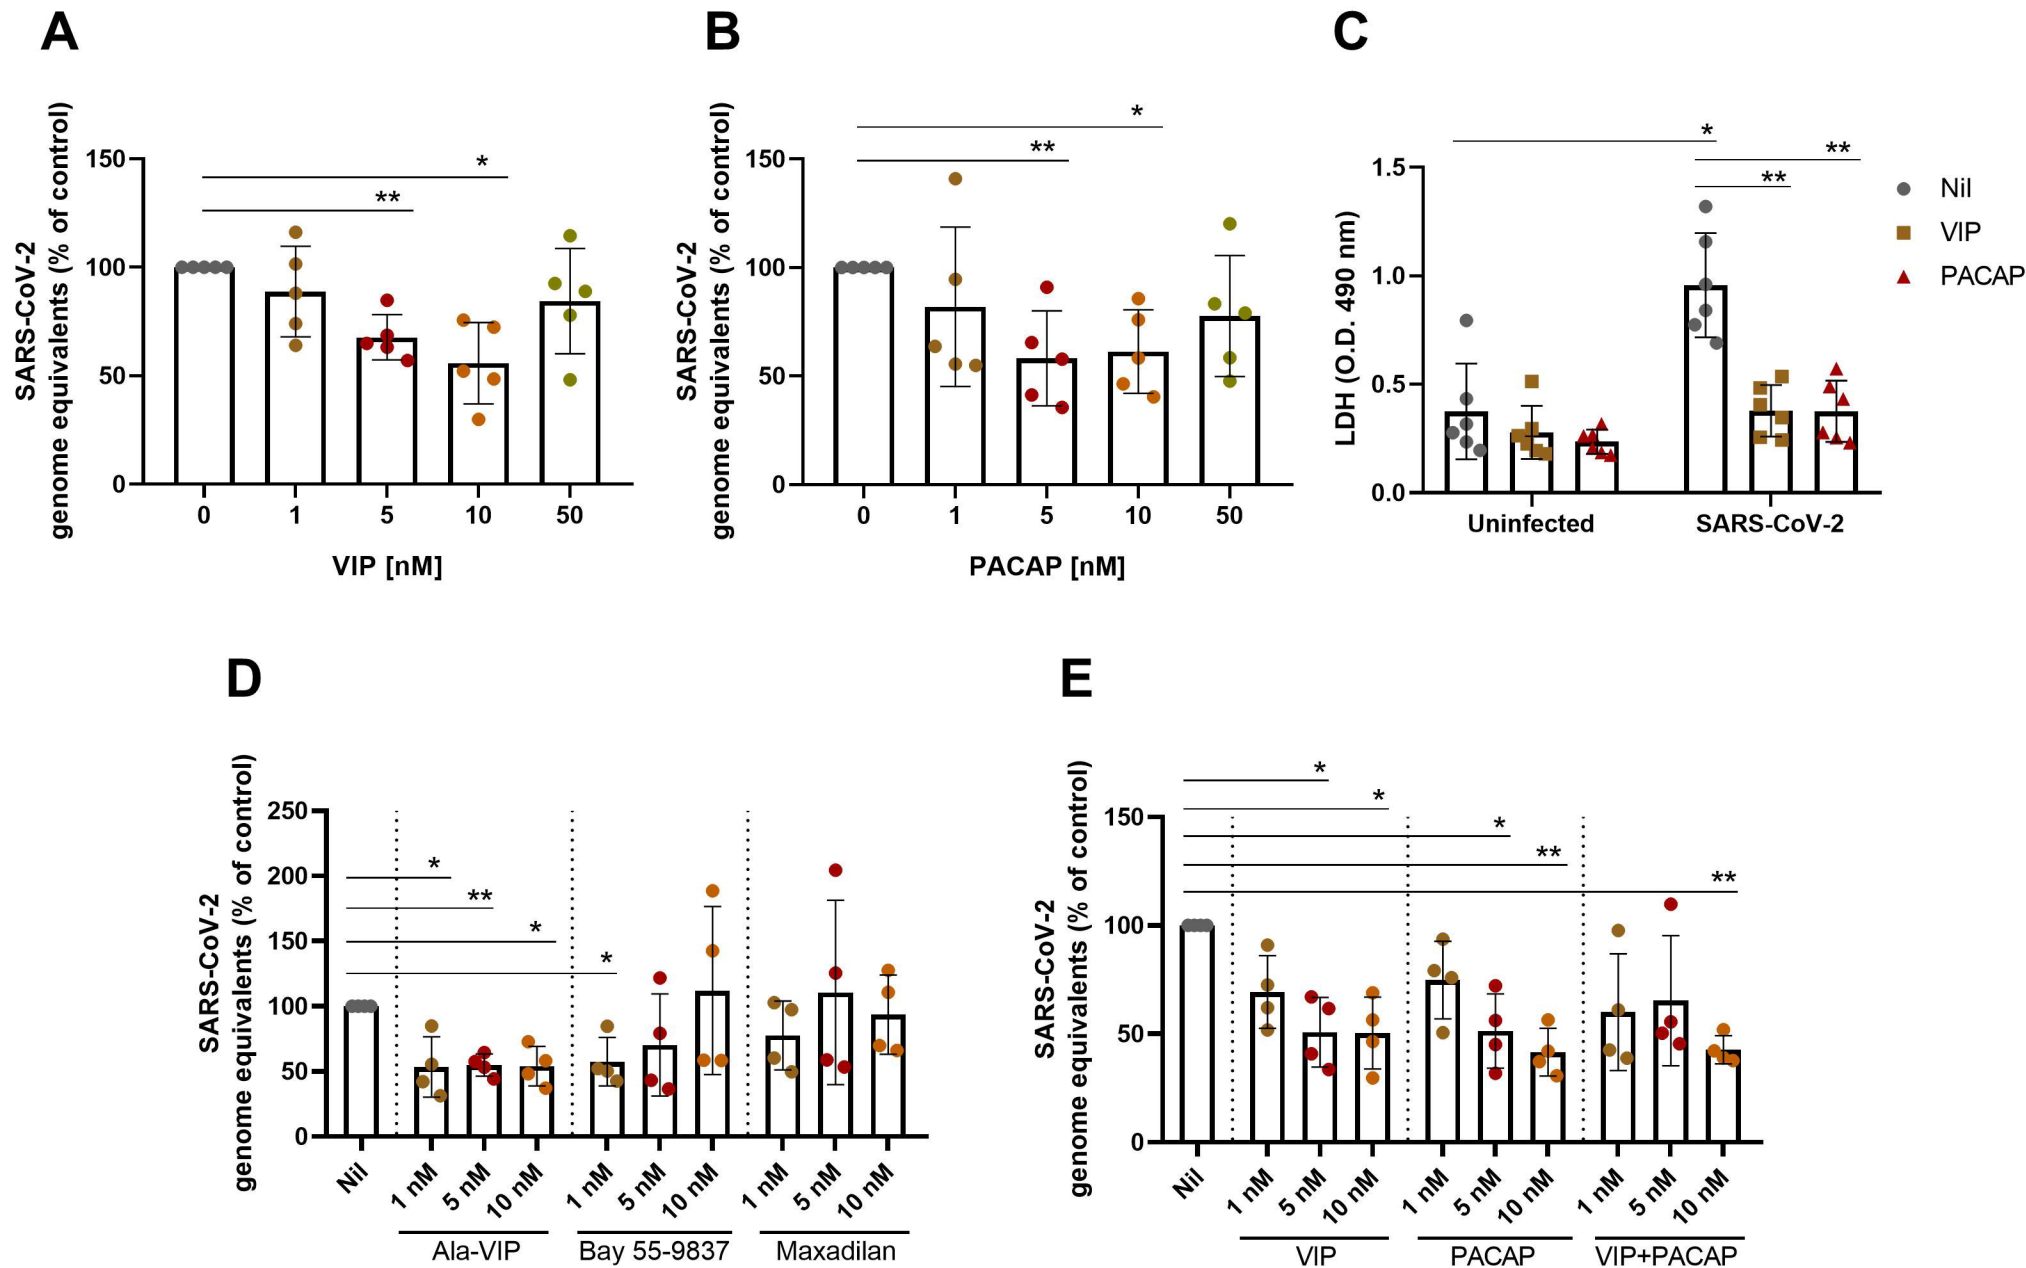

Figure 2

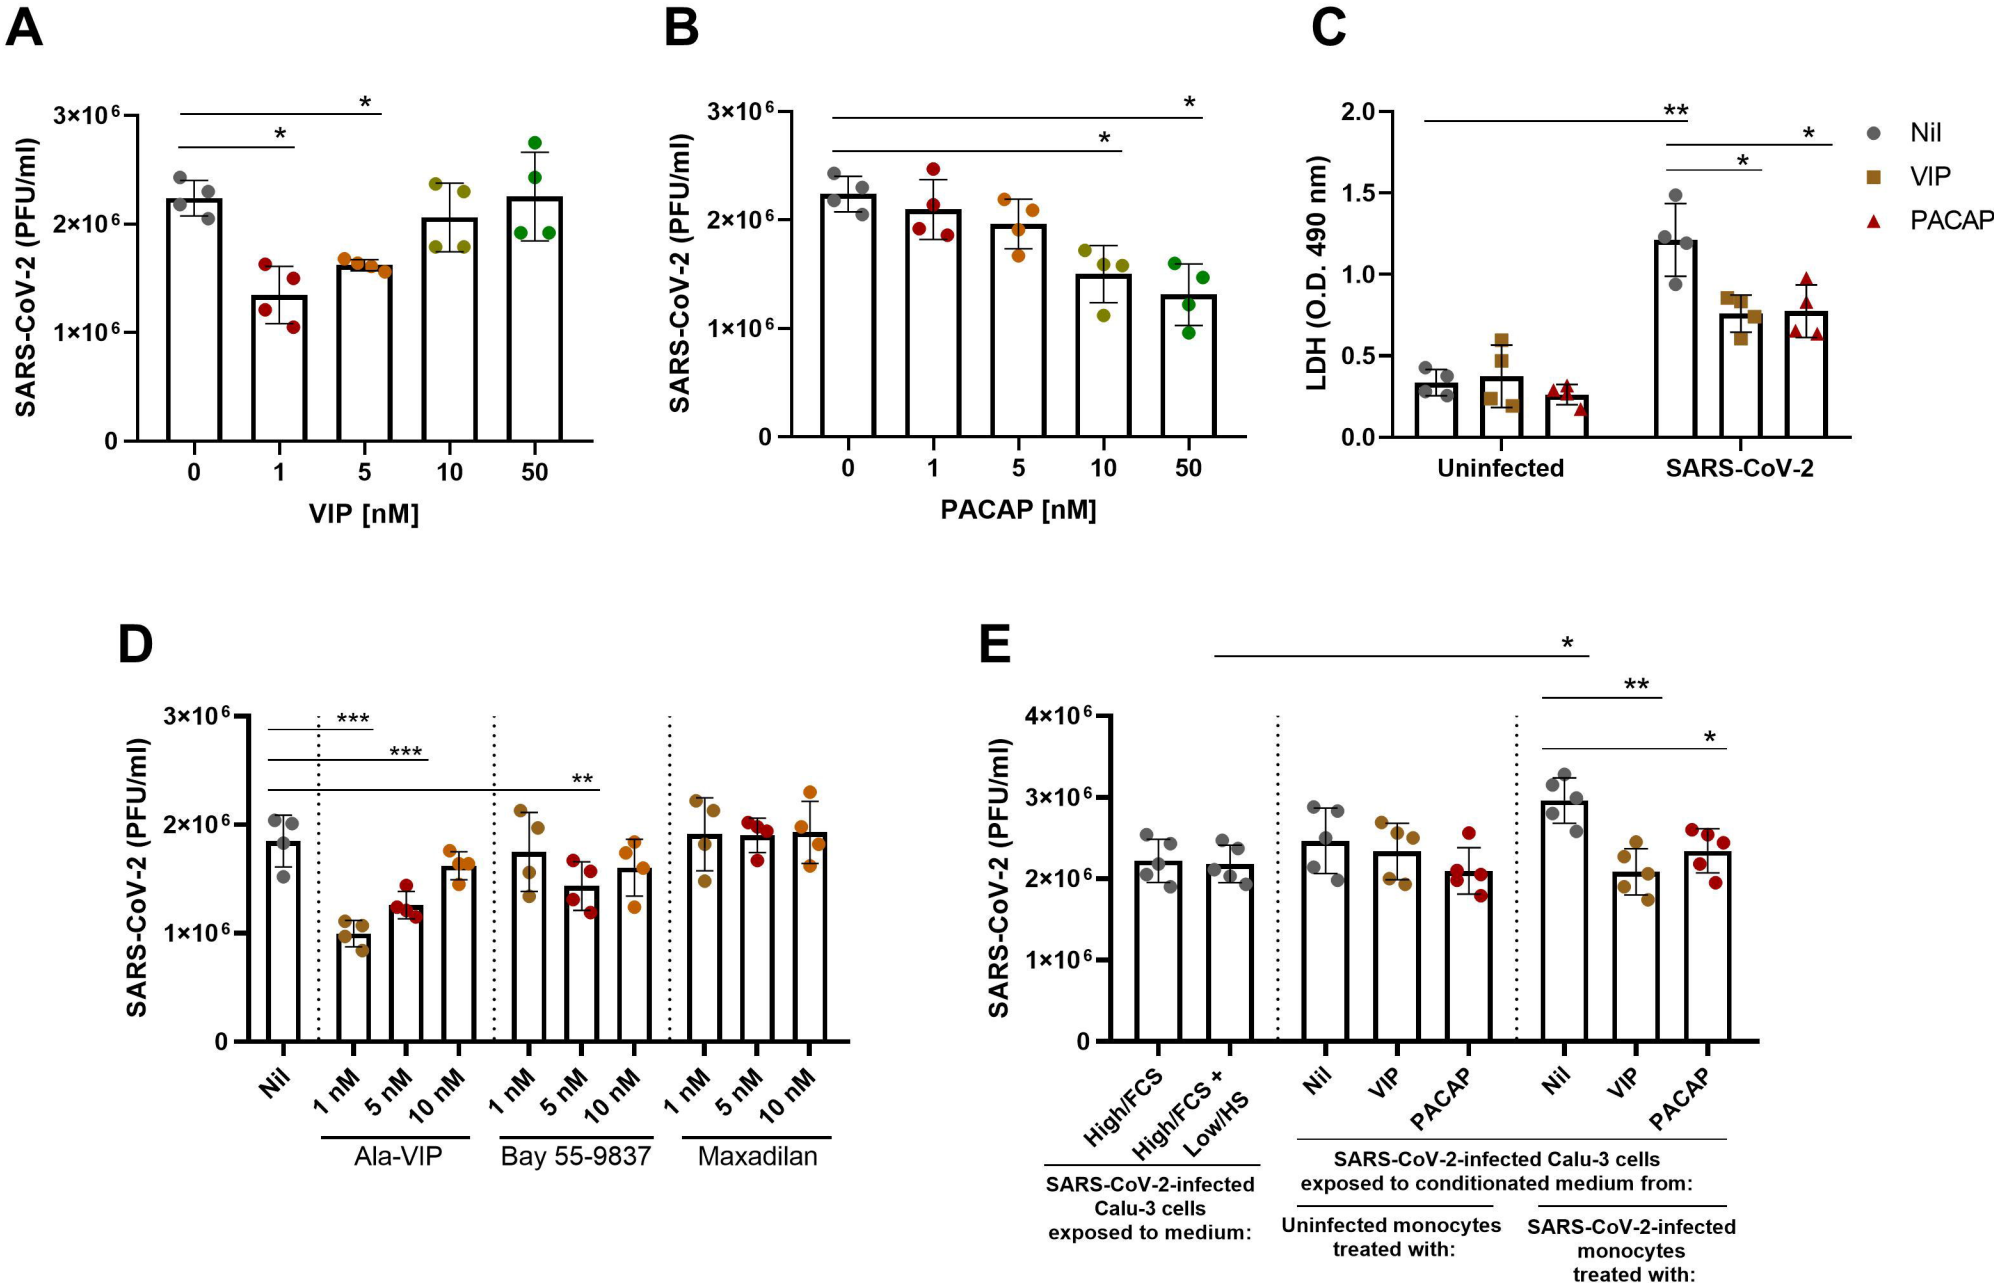

Figure 3

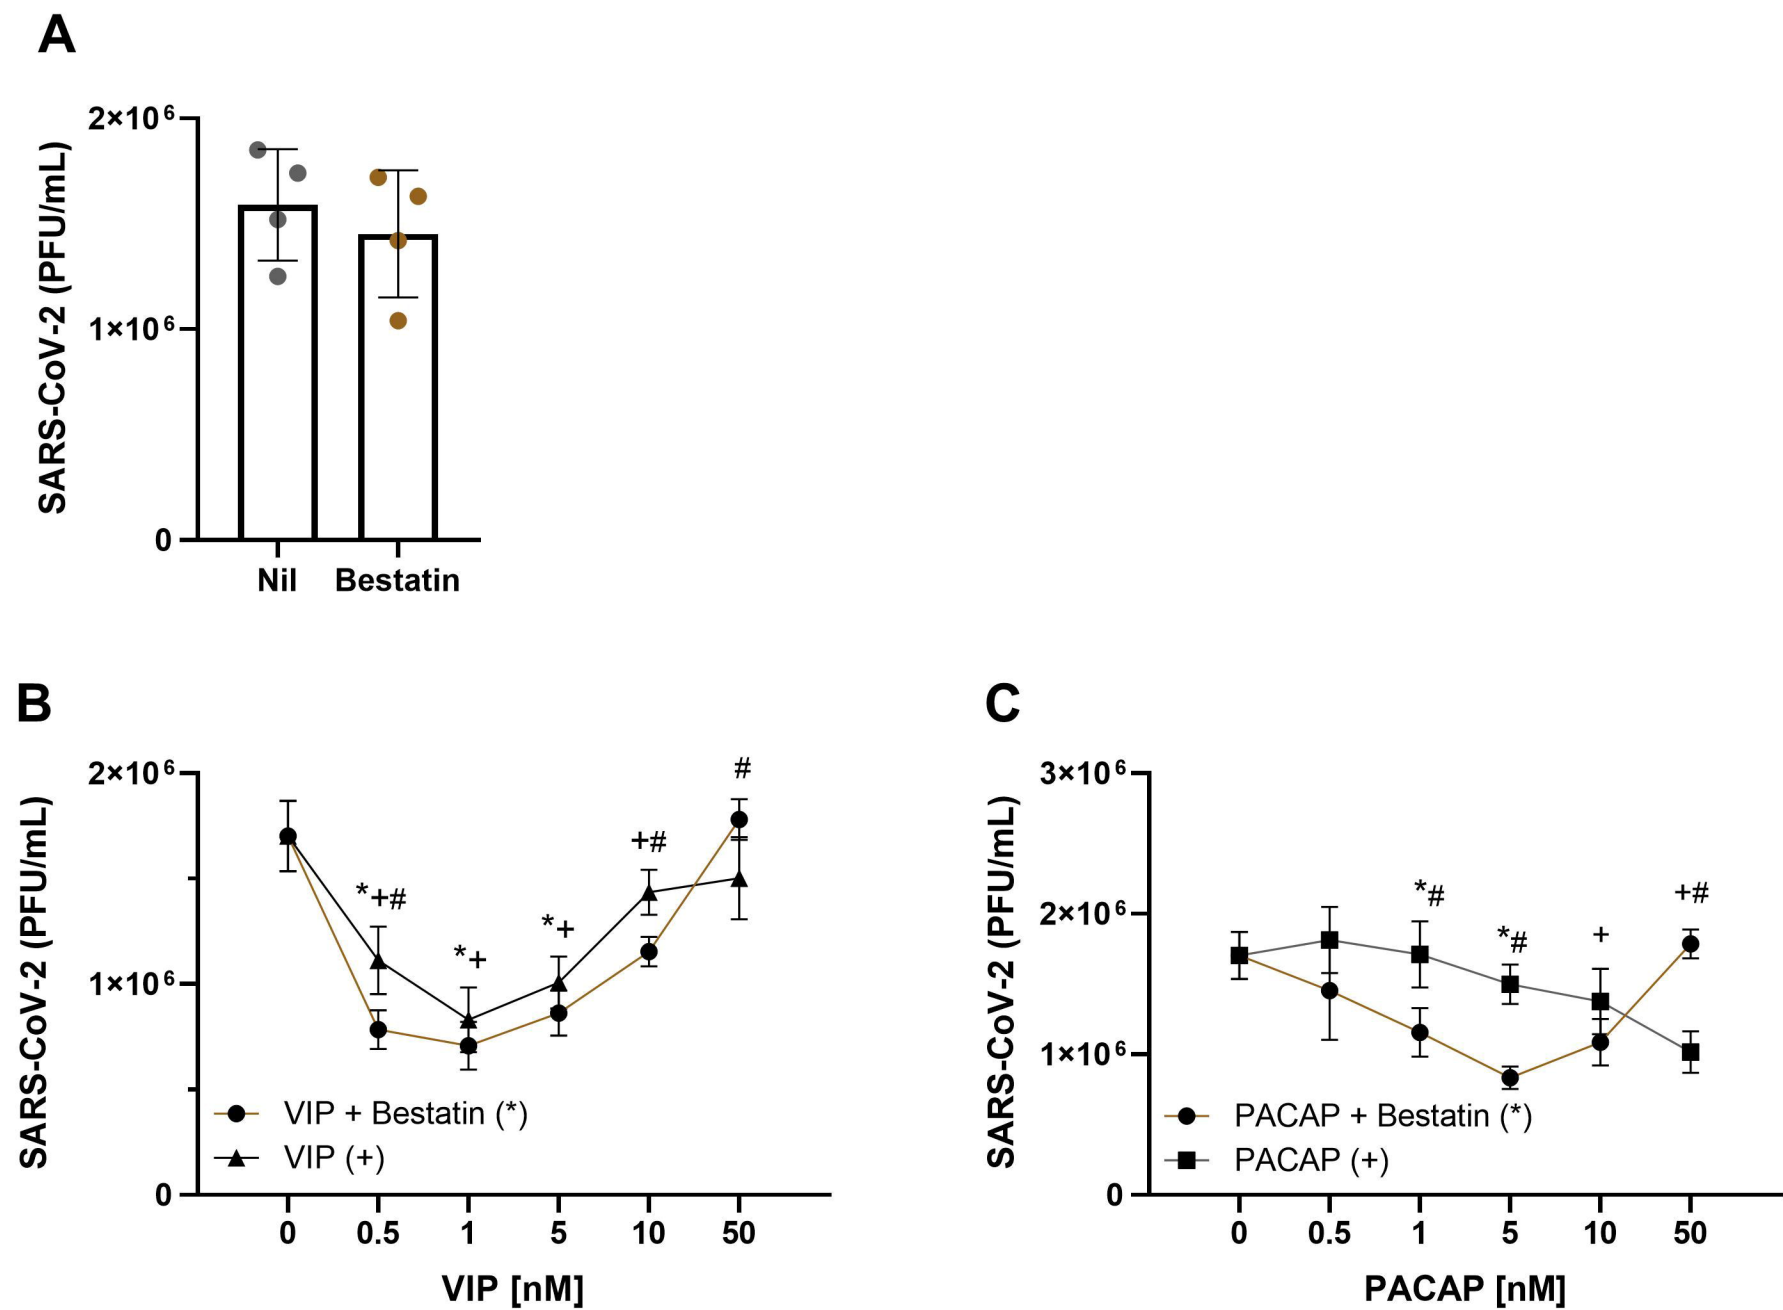

Figure 4

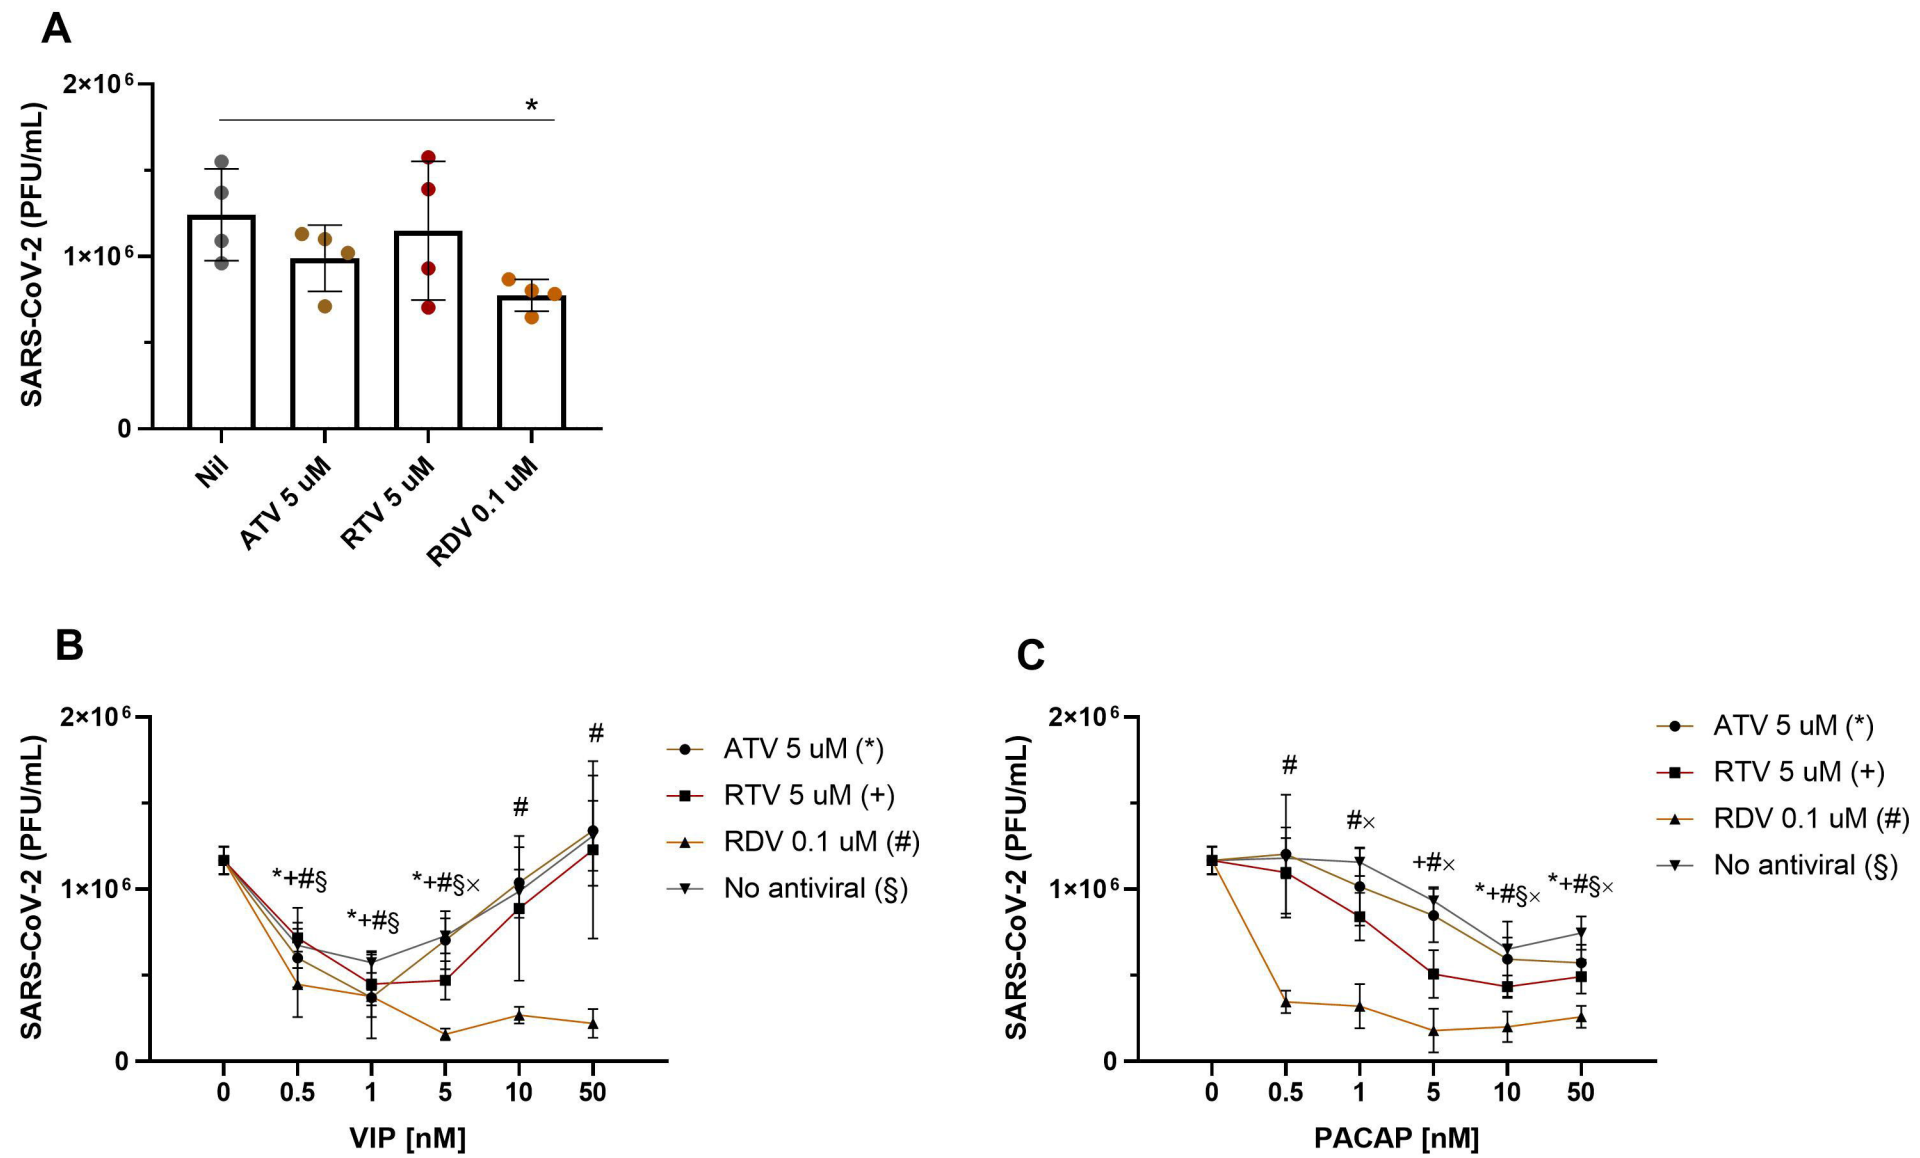

**Figure 5**

**A**

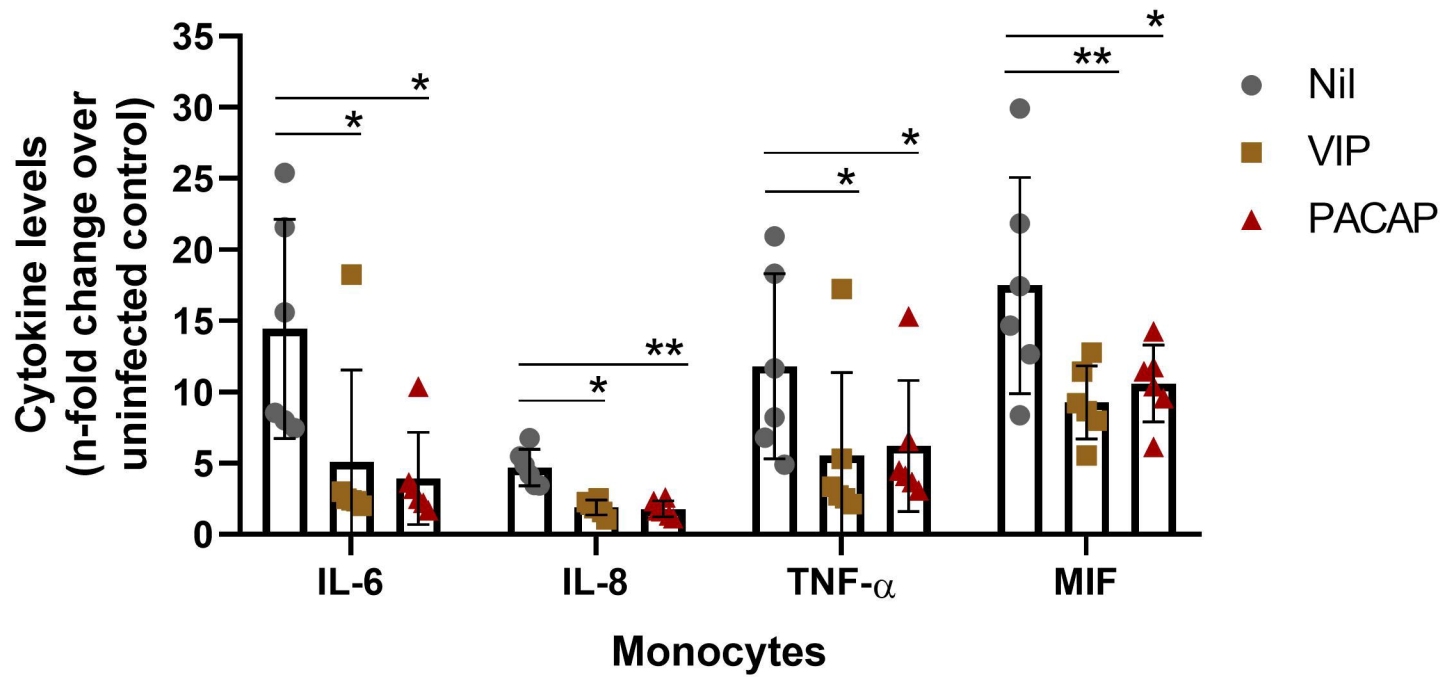

**B**

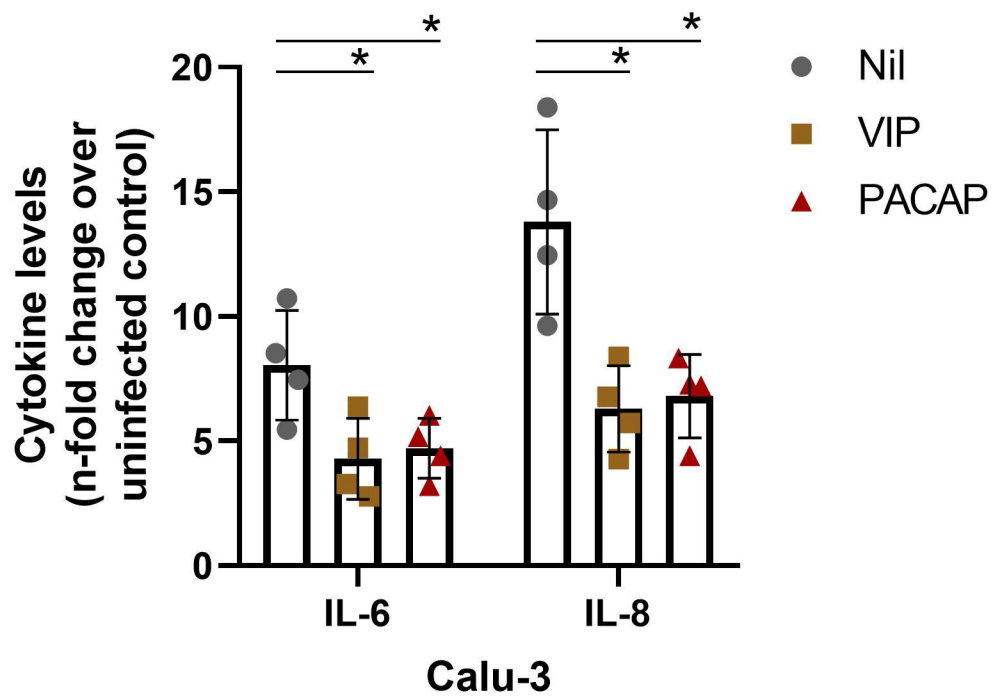



Figure 6

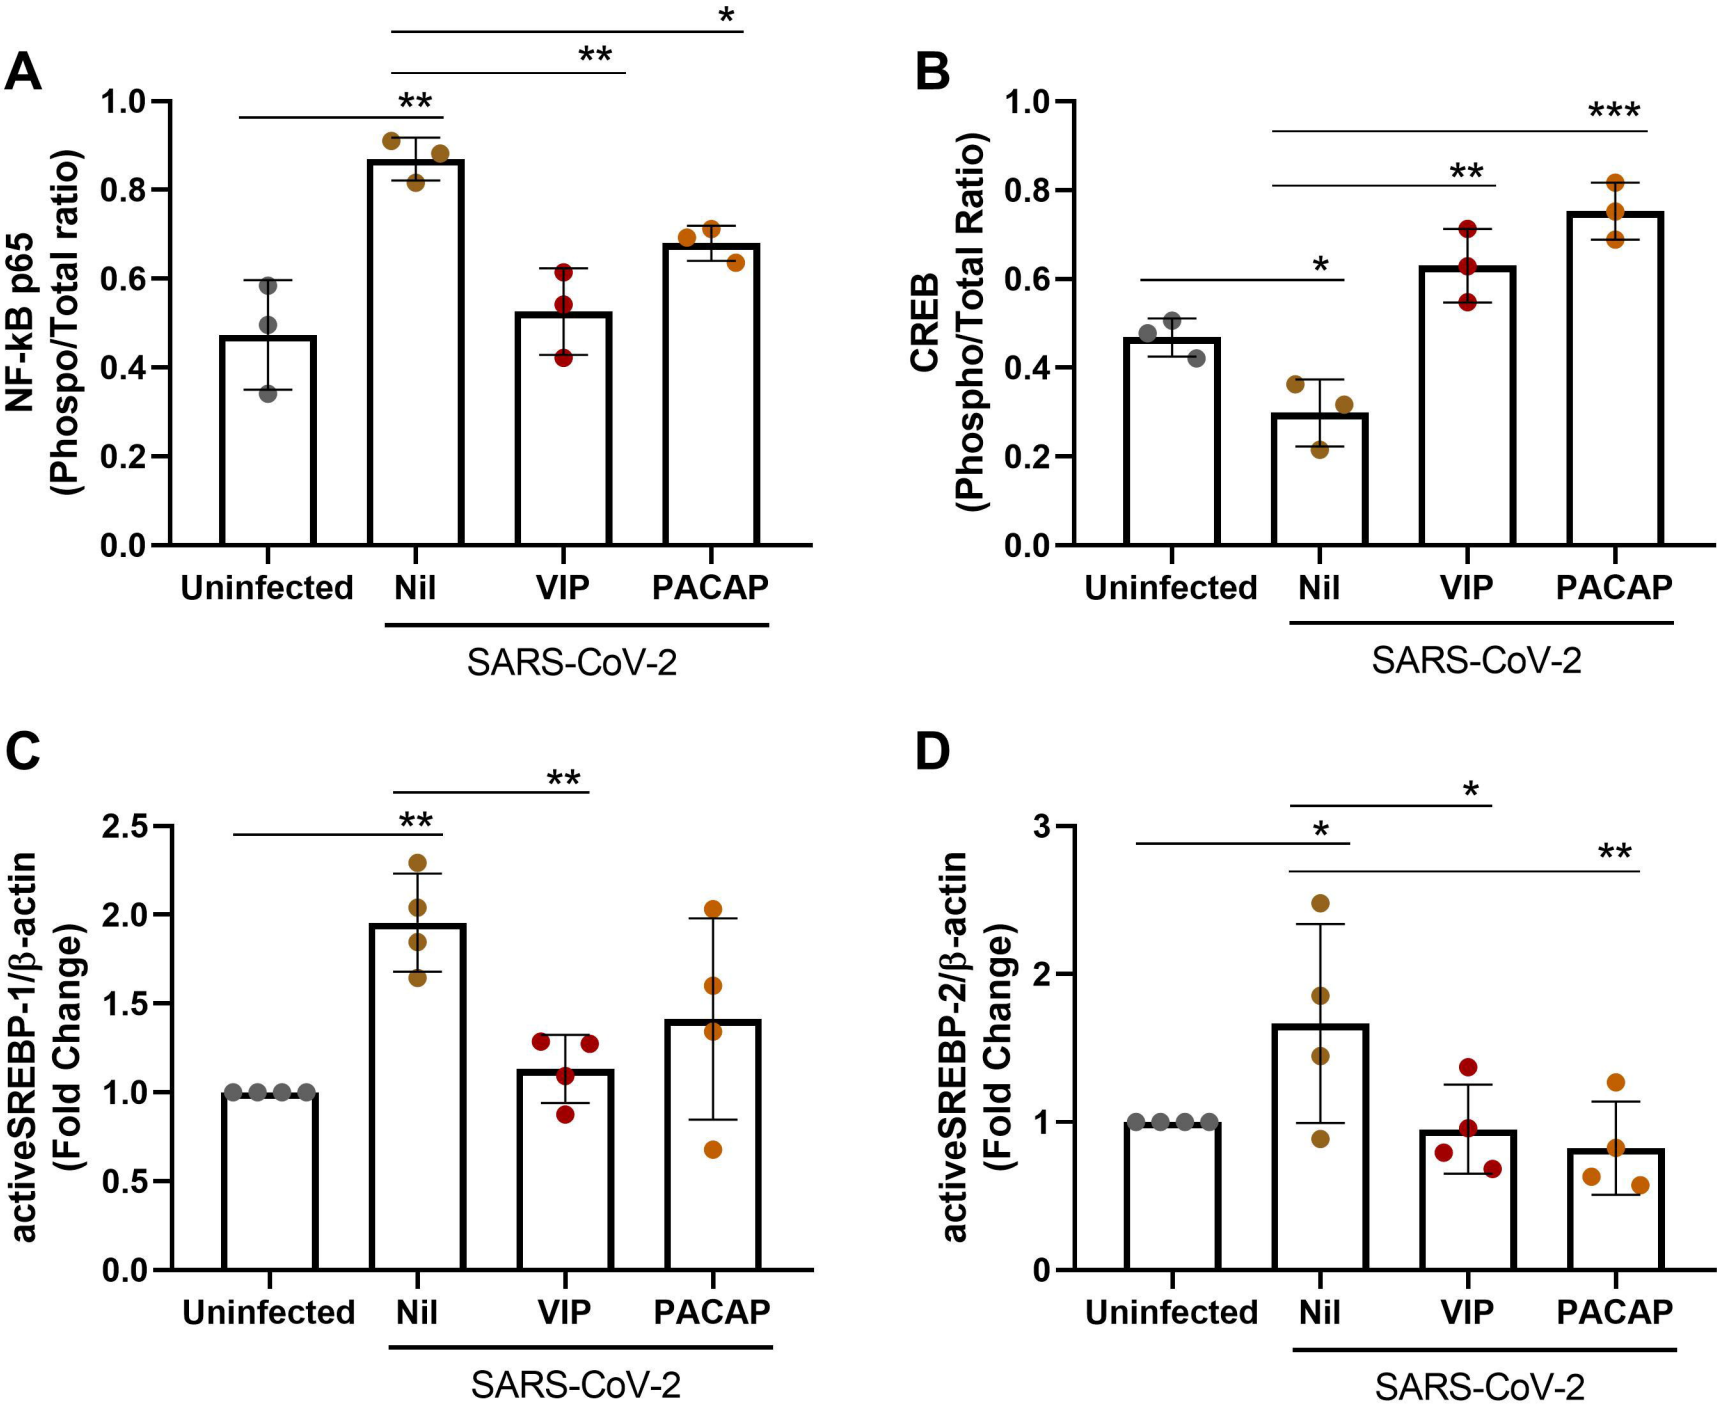

**Figure 7**

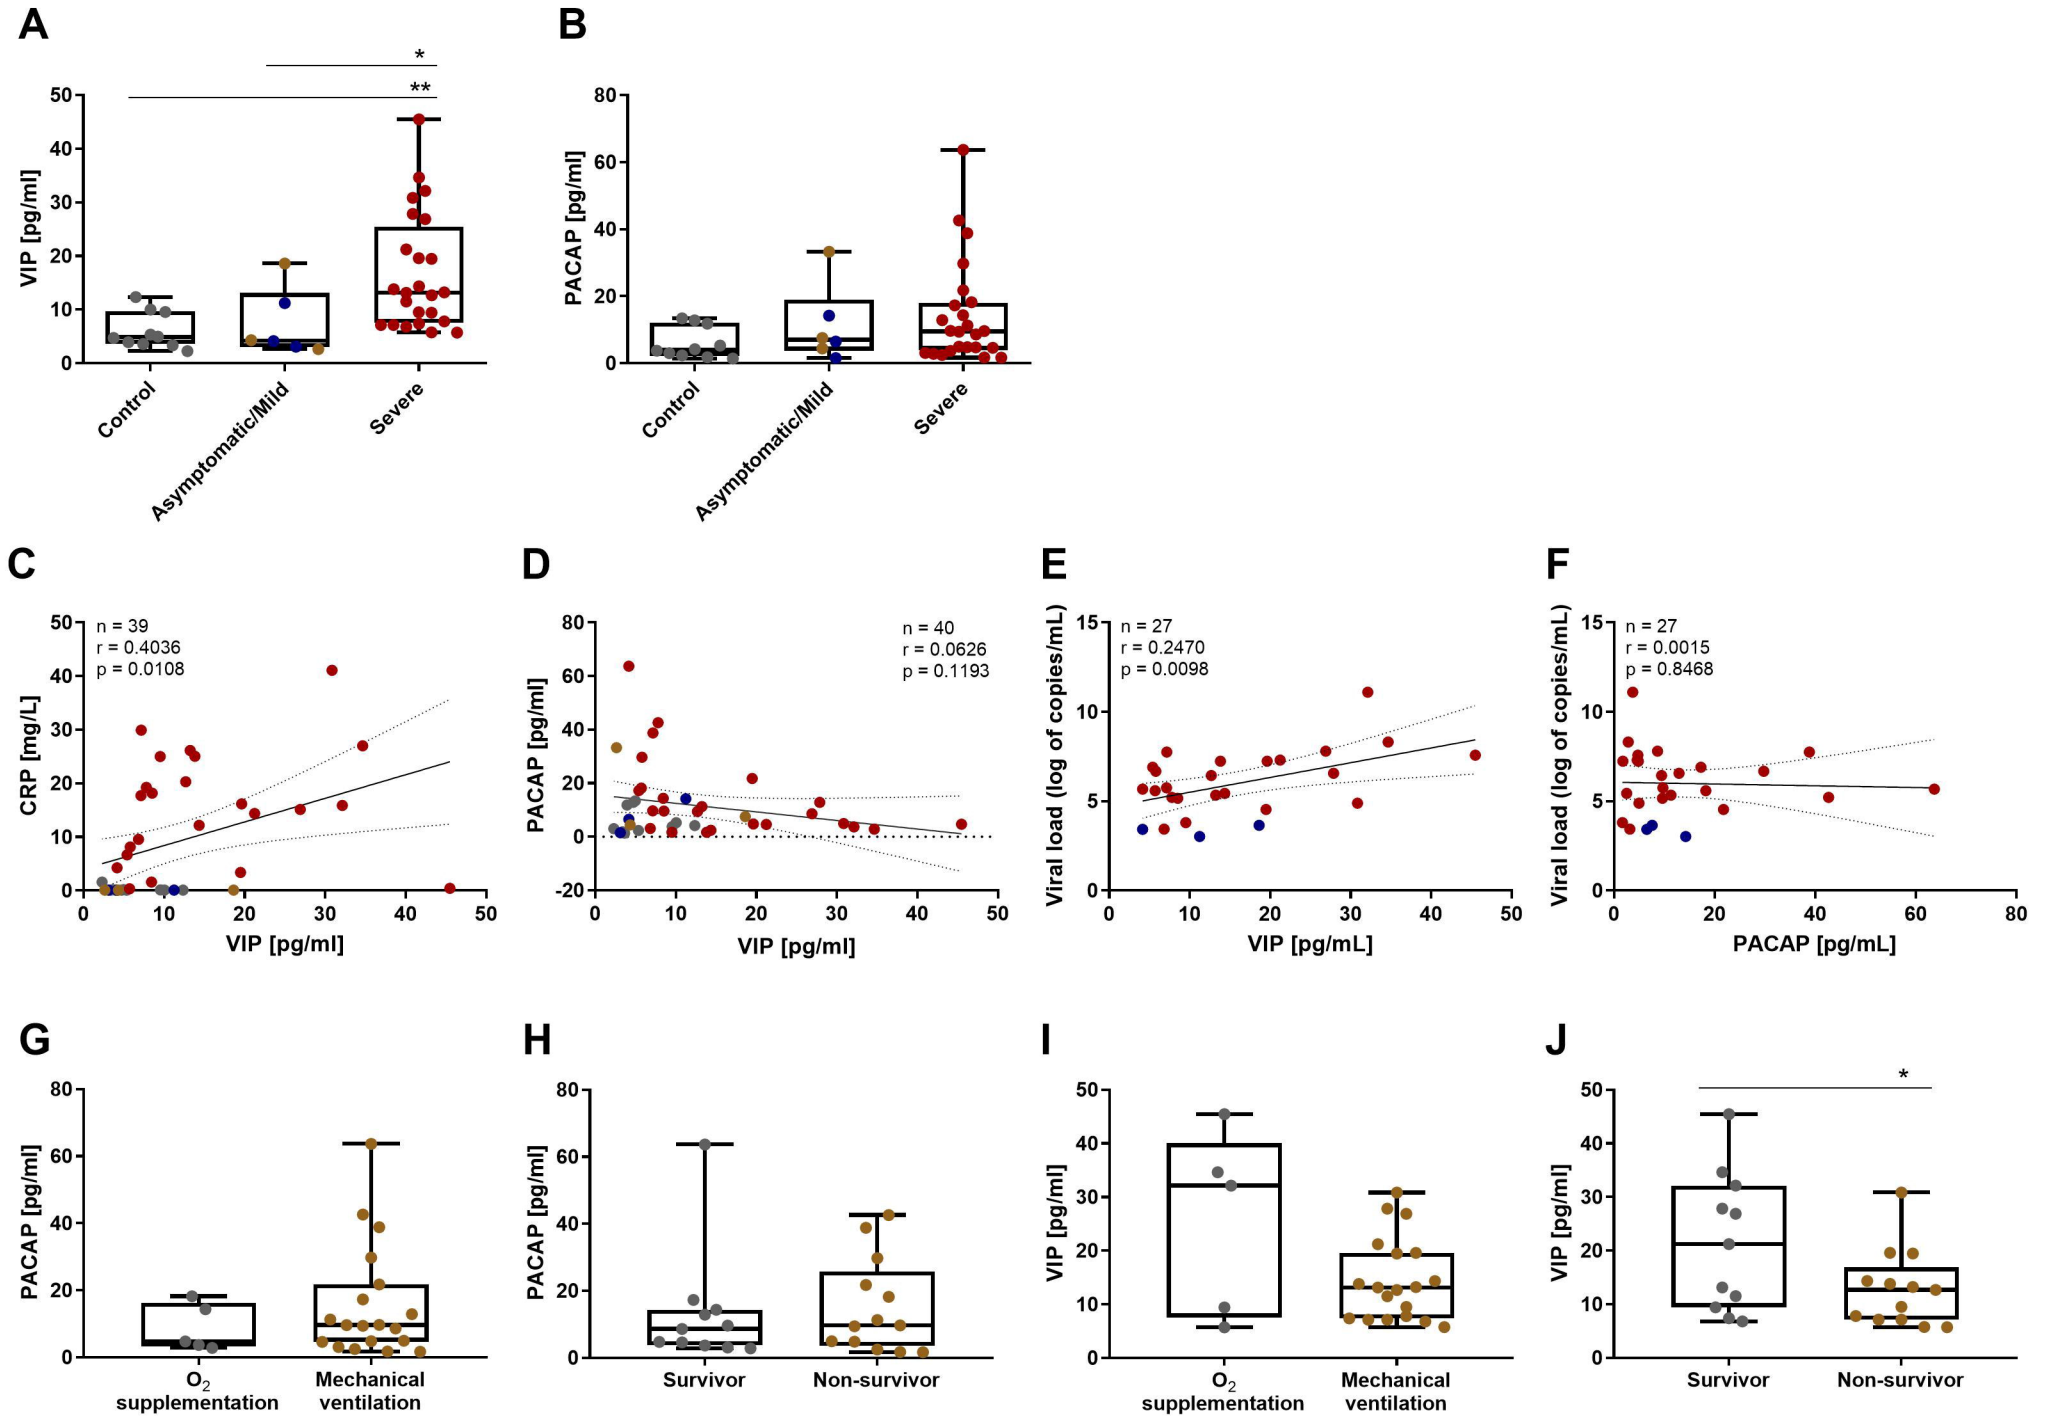

Source: https://www.biorxiv.org/content/10.1101/2020.07.25.220806v4.full.pdf
